1 **MicroRNA 1253 regulation of WAVE2 and its relevance to health disparities in hypertension**

2  
3 **Mercy A. Arkorful<sup>1</sup>, Nicole Noren Hooten<sup>2</sup>, Yongqing Zhang<sup>3</sup>, Amirah N. Hewitt<sup>2</sup>, Lori**  
4 **Barrientos Sanchez<sup>2</sup>, Michele K. Evans<sup>2</sup>, Douglas F. Dluzen<sup>1\*</sup>**

5  
6 <sup>1</sup>Department of Biology, Morgan State University, Baltimore, Maryland, United States of America

7  
8 <sup>2</sup>Laboratory of Epidemiology and Population Science, National Institute on Aging, Baltimore,  
9 Maryland, United States of America

10  
11 <sup>3</sup>Laboratory of Genetics and Genomics, National Institute on Aging, Baltimore, Maryland, United  
12 States of America

13  
14 **\* Correspondence:**

15 Douglas F. Dluzen, PhD  
16 Morgan State University  
17 Spencer Hall, Room 111  
18 1700 E. Cold Spring Lane  
19 Baltimore, MD 21251  
20 443-885-4462  
21 douglas.dluzen@morgan.edu

22  
23  
24  
25  
26  
27  
28  
29  
30  
31  
32  
33  
34  
35  
36  
37  
38  
39  
40  
41  
42  
43  
44  
45  
46  
47  
48 **Keywords: hypertension, differential gene expression, microRNA, actin cytoskeletal regulators,**  
49 **endothelial cell, health disparities African-American, women, race**

50 **Abstract**

51 The prevalence of hypertension among African Americans (AAs) in the US is among the highest of  
52 any demographic and affects over two-thirds of AA women. Previous data from our laboratory  
53 suggests substantial differential gene expression of mRNAs and microRNAs (miRNAs) in peripheral  
54 blood mononuclear cells (PBMCs) isolated from AA and white women with or without hypertension.  
55 We hypothesized that differential gene expression by race may contribute to racial differences in  
56 hypertension. We found that the Wiskott-Aldrich syndrome protein Verprolin homologous-2  
57 (*WAVE2*) is differentially-expressed in AA women with hypertension, along with several other  
58 members of the actin cytoskeleton signaling pathway that plays a role in cell shape and branching of  
59 actin filaments. We performed an *in silico* miRNA target prediction analysis that suggested miRNA  
60 miR-1253 regulates *WAVE2*. Transfection of miR-1253 mimics into human umbilical vein  
61 endothelial cells (HUVECs) and human aortic endothelial cells (HAECs) significantly repressed  
62 *WAVE2* mRNA and protein levels ( $P<0.05$ ), and a luciferase reporter assay confirmed that miR-  
63 1253 regulates the *WAVE2* 3' UTR ( $P<0.01$ ). miR-1253 over-expression in HUVECs significantly  
64 increased HUVEC lamellipodia formation ( $P<0.01$ ), suggesting the miR-1253/*WAVE2* interaction  
65 may play a role in endothelial cell shape and actin cytoskeleton function. Together, we have  
66 identified novel roles for miR-1253 and *WAVE2* in a hypertension-related disparities context. This  
67 may ultimately lead to the discovery of additional actin-related genes which are important in the  
68 vascular-related complications of hypertension and influence the disproportionate susceptibility to  
69 hypertension among AAs in general and AA women in particular.

70  
71  
72  
73  
74  
75  
76  
77  
78  
79  
80  
81  
82  
83  
84  
85  
86  
87  
88  
89  
90  
91  
92  
93  
94  
95  
96  
97  
98

## 99 Introduction

100 Throughout the United States, systemic arterial hypertension and hypertension-related  
101 conditions, including coronary atherosclerotic heart disease and cerebrovascular disease, have  
102 disproportionate incidence, mortality, and morbidity among African Americans (AAs). AA women  
103 are at particular risk. Between 2013-2016 66% of AA females over  $\geq 20$  yrs had hypertension,  
104 compared with 41.3% of non-Hispanic white women, 41% of Hispanic women, and 36% of Asian  
105 women (Benjamin et al., 2019). Reducing or eliminating hypertension is predicted to reduce  
106 cardiovascular disease (CVD)-related mortality in women by almost 40% (Patel et al.,  
107 2015; Benjamin et al., 2019). While 75% of AA women are aware of having hypertension, only 26%  
108 of AA women were able to control their high blood pressure (Benjamin et al., 2019). A deeper  
109 understanding of the underlying biological mechanisms associated with hypertension may help  
110 reduce the burden of this condition.

111 Differential gene expression (DGE) can be linked with ancestry and can influence how  
112 individuals respond to environmental stimuli and exposures (Nedelec et al., 2016; Thames et al.,  
113 2019), their susceptibility to chronic diseases including cancer (Wang et al., 2015) and peripheral  
114 arterial disease (PAD) (Gardner et al., 2015). Investigations have shown that DGE can also predict  
115 outcomes to medical procedures including heart transplants (Moayed et al., 2019). DGE patterns are  
116 also linked with sex. We previously reported that there is substantial differential mRNA and  
117 microRNA expression of hypertension-related genes and pathways in peripheral blood mononuclear  
118 cells (PBMCs) between AA and white women with hypertension (Dluzen et al., 2016; Dluzen et al.,  
119 2017). We observed that genes in canonical pathways related to hypertension, such as the renin-  
120 angiotensin (RAS) pathway, are expressed in reciprocal directions that is dependent upon race  
121 (Dluzen et al., 2016). A follow-up analysis of these results identified that poly-(ADP-ribose)  
122 polymerase 1 (PARP-1), a DNA damage sensor protein involved in DNA repair and other cellular  
123 processes, is upregulated in hypertensive AA women compared with white hypertensive women and  
124 contributes to cellular response to inflammation (Dluzen et al., 2017). AA women with PAD also  
125 have elevated levels of endothelial oxidative stress and circulating inflammatory biomarkers  
126 compared with AA men with PAD (Gardner et al., 2015) and these differences may influence disease  
127 outcomes in AA women.

128 Understanding not only the significance of DGE patterns in hypertension and CVDs, but also  
129 the underlying genetic mechanisms that regulate these patterns, will help further our understanding of  
130 the biological basis of these conditions. Expression of hypertension-related genes can be regulated by  
131 ancestral genomic polymorphisms and expression quantitative trait loci (eQTLs) (Ness et al.,  
132 2004; Liang et al., 2017), but this does not account for all differences previously observed. This  
133 suggests alternative mechanisms also contribute to gene expression differences in different  
134 individuals. A possible contribution to variations in gene expression levels may arise from regulation  
135 from microRNAs.

136 MicroRNAs (miRNAs) are short (20-22 nucleotide), single-stranded RNAs that post-  
137 transcriptionally regulate protein expression by binding with target mRNA 3' untranslated regions  
138 (UTRs) and inhibiting translation, often by degrading the target mRNA (Mukherji et al., 2011).  
139 miRNA regulation of protein expression is integral to the proper functioning and health of the  
140 endothelial tissues of the vasculature, underlying smooth muscle layers, and vascular-response to  
141 changes in shear stress (Hergenreider et al., 2012; Shi and Fleming, 2012; Schober et al., 2014).  
142 Disruption of miRNA regulation of hypertension-related genes can lead to endothelial dysfunction  
143 (Schober et al., 2014; Krieger et al., 2015; Jusic et al., 2019). We previously reported that nine  
144 miRNAs exhibit disease-or race-specific differential expression and we have identified and validated  
145 novel hypertension-related targets for eight of these miRNAs (Dluzen et al., 2016; Dluzen et al.,  
146 2017). Here, we sought to identify and validate novel hypertension-related targets for miR-1253,  
147 which is significantly downregulated in PBMCs of hypertensive AA women (Dluzen et al., 2016),

148 but had remained unexplored in our prior analyses. We have reanalyzed our microarray dataset to  
149 further our understanding of differential gene expression in hypertensive women in hypertension-  
150 related pathways (Dluzen et al., 2016). We identified significant differential gene expression within  
151 the actin-cytoskeleton signaling pathway between hypertensive AA and white women and we have  
152 validated hypertension-related miR-1253 as a novel regulator of WASP family Verprolin-  
153 homologous protein 2 (WAVE2), an integral member of the actin-cytoskeleton pathway.  
154

## 155 **Results**

156 We used the DIANA-Tarbase v7.0 (Vlachos et al., 2015) and TargetScan v7.2 (Agarwal et  
157 al., 2015) algorithms to identify potential miR-1253 mRNA targets in humans. DIANA-Tarbase  
158 predicted 4,723 mRNAs as potential targets and TargetScan identified 5,345 mRNAs (Figure 1A, see  
159 Supp. File 1 for complete list). There were 2,885 unique mRNAs that overlapped between both  
160 prediction programs and we used this list moving forward with our *in silico* analysis. We compared  
161 the 2,885 mRNAs with the 3,354 mRNAs found to be differentially-expressed in PBMCs in our  
162 hypertension cohort when comparing gene expression between AA and white women with or without  
163 hypertension (Dluzen et al., 2016). We found that 840 of the miR-1253 predicted targets exhibited  
164 differential-expression in PBMCs (Figure 1B; Supp. File 1) and 112 of these predicted targets are  
165 also found in our previously-curated list of 1,266 genes related to hypertension and inflammation  
166 (Figure 1C; Supp. File 1) (Dluzen et al., 2016).

167 We next sought to further parse down this list of 112 mRNA targets and validate the role of  
168 miR-1253 in potentially regulating expression of some of these mRNAs. We over-expressed 50 nM  
169 of miR-1253 mimic in human aortic endothelial cells (HAECs) for 48 hours and performed a  
170 discovery microarray to assess gene expression level changes. We used Ingenuity Pathway Analysis  
171 (IPA) to identify the Top Disease and Disorders and Molecular and Cellular Functions associated  
172 with miR-1253 over-expression. We observed that pathways related to cardiovascular disease,  
173 cellular growth and proliferation, and cellular assembly and organization were the most significantly  
174 affected in response to miR-1253 expression and within the top five of pathways in each category  
175 (Figure 1D).

176 We next examined DGE in the actin cytoskeleton signaling pathway in our hypertension  
177 cohort by reanalyzing our previous microarray dataset [GSE75672](#). We chose this pathway given the  
178 role of actin cytoskeletal remodeling and signaling in hypertension and endothelial function (Davies,  
179 2009; Spindler et al., 2010; Iskratsch et al., 2014) and the importance of this pathway in CVD and  
180 cellular growth and proliferation (Figure 1D). We used Ingenuity Pathway Analysis (IPA) to overlay  
181 mRNA expression in PBMCs that were isolated from 24 age-matched females who were either  
182 African American normotensive women (AANT), African American hypertensive women (AAHT),  
183 white normotensive women (WNT), or white hypertensive women (WHT; n=6/group, as previously  
184 extensively described in (Dluzen et al., 2016)) to identify DGE in this pathway.

185 While only *PAK* was significantly higher in AANT compared with WNT in this pathway  
186 (Figure 2A), we found that 27 genes of the 75 in the actin cytoskeleton signaling pathway are  
187 significantly different ( $P < 0.05$  and  $|\text{fold-change}| > 1.5$ ; Supp. Table 1) when comparing AAHT with  
188 WHT (Figure 2B). There are only three genes significantly different in this pathway between WHT  
189 and WNT in our cohort (*ARP2*, *ACTG1* [*F-actin*], and *SRC*; Supp. Figure 1A) and *ARP2* and *ACTG1*  
190 are reciprocally-expressed when comparing AAHT with AANT (Supp. Figure 1B) suggesting that  
191 these genes exhibit DGE by race in hypertensive women. We also observed that there are more genes  
192 significantly different when comparing AAHT with AANT (Supp. Figure 1B) than when comparing  
193 WHT with WNT, suggesting that the actin cytoskeleton signaling pathway is an overlooked gene  
194 pathway when examining health disparities in hypertension, particularly in AA women.

195 In order determine whether miR-1253 might play a role in the differential-expression of genes  
196 within the actin cytoskeleton signaling pathway, we compared those mRNAs significantly down-

197 regulated in HAECs via over-expression of miR-1253 mimic against the 1,266 genes in our  
198 hypertension gene list. There were 747 mRNAs significantly repressed >1.5-fold compared with the  
199 scrambled negative control ( $P < 0.05$ ; FDR < 0.20;  $n = 5$ ; Supp. File 1). Of these 747, 23 mRNAs are  
200 within our hypertension gene list and significantly different in our hypertension cohort (Table 1).  
201 One of these genes, WASP family Verprolin-homologous protein 2 (WAVE2), plays a role in the  
202 regulation of the actin cytoskeleton (Beli et al., 2008; Krause and Gautreau, 2014). miR-1253 is also  
203 predicted to target two other genes in the actin cytoskeleton pathway, Filamin A, Alpha (*FLNA*) and  
204 Ras Homolog A (*RHOA*), however, neither of these two mRNAs were significantly down-regulated  
205 by miR-1253 in our screen. Therefore, we focused on *WAVE2* as a potential target of miR-1253.

206 We performed a luciferase reporter assay using miTarget reporter vectors to confirm that  
207 miR-1253 can regulate the 3' untranslated region (UTR) of *WAVE2*. The 3' UTR of *WAVE2* is 3,959  
208 nucleotides in length and was split between two miRTarget plasmids. These heterologous reporter  
209 plasmid contain luciferase with a downstream renilla luciferase (RL) transfection control. The  
210 miRTarget *WAVE2* 3'UTR-1 plasmid contains the first 2,010 nucleotides of the *WAVE2* 3' UTR,  
211 including the last 21 nucleotides of its coding region. The miRTarget *WAVE2* 3' UTR-2 plasmid  
212 contains nucleotides 1,888 to 3,959 of the *WAVE2* 3' UTR and there is a common overlap of 122  
213 nucleotides of the 3'UTR between plasmid 1 and 2 (Figure 3A). TargetScan predicted that miR-1253  
214 binds to the *WAVE2* 3' UTR at nucleotides 3,734 to 3,756 in the second half of the *WAVE2* 3' UTR,  
215 which is referred to as the *WAVE2* 3'UTR binding site #3 (Figure 3B). We also identified potential  
216 seed region binding sites at two additional positions at nucleotides 1,617 to 1,622 (binding site #1)  
217 and 1,775 to 1,780 (binding site #2) which are found in the first half of the 3'UTR (Figure 3A).  
218 Human umbilical vein endothelial cells (HUVECs) were co-transfected with 50 nM miR-1253 or  
219 scrambled control mimics and either miRTarget *WAVE2* 3'UTR-1 or 3'UTR-2. We observed  
220 significant repression of luciferase activity for miRTarget 3'UTR-1 ( $P < 0.01$ ,  $n = 3$ ) and miRTarget  
221 3'UTR-2 ( $P < 0.001$ ,  $n = 3$ ) in the presence of miR-1253 and compared to scrambled control (Figure  
222 3C). These data indicated that miR-1253 can bind to the *WAVE2* 3' UTR and reduce protein  
223 expression.

224 We next validated whether miR-1253 can regulate *WAVE2* expression *in vitro*. We over-  
225 expressed 50 nM miR-1253 mimic for 48 hours in human aortic endothelial cells (HAECs). In the  
226 presence of miR-1253, *WAVE2* mRNA levels were significantly repressed nearly 50% ( $P < 0.05$ ;  $n = 3$ )  
227 and the corresponding *WAVE2* protein levels were significantly down-regulated by nearly 60%  
228 ( $P < 0.01$ ;  $n = 3$ ) compared with a scrambled control mimic (Figure 4A). In order to verify this is not a  
229 cell-line specific effect, we also performed the same experiments in HUVEC cells. miR-1253 mimics  
230 significantly repressed *WAVE2* mRNA 55% ( $P < 0.01$ ;  $n = 5$ ) and *WAVE2* protein 38% ( $P < 0.001$ ;  $n = 5$ )  
231 (Figure 4B). Together, these results confirm our *in silico* prediction that miR-1253 can regulate the  
232 expression of *WAVE2* in endothelial cells.

233 Given that *WAVE2* is a key regulator of actin cytoskeleton dynamics, we assessed whether  
234 this regulatory network may affect the actin cytoskeleton. We transfected 50 nM scrambled control or  
235 miR-1253 mimics into HUVECs for 48 hours and stained with rhodamine phalloidin to visualize  
236 actin cytoskeletal structures. We observed morphological changes in cells transfected with miR-1253  
237 mimic compared to scrambled control mimics (Figure 5). Protrusive actin-containing structures such  
238 as lamellipodia or filopodia are formed at the leading edge of cells. Lamellipodia form larger actin-  
239 containing ruffles while filopodia are characterized by actin-containing finger-like extensions from  
240 the cell. Cells with transfected miR-1253 had increased lamellipodia formation as shown by  
241 concentrated actin-rich membrane-ruffling at the edges of cells. Therefore, we scored these cells by  
242 the presence of either lamellipodia or filopodia. We observed that there was a significant increase in  
243 lamellipodia in HUVECs with miR-1253, indicating an increase in actin-rich membrane ruffling at  
244 the edges of the cells ( $P < 0.001$ ;  $n = 3$ ) (Figure 5A and 5B). miR-1253 did not affect the formation of  
245 actin-rich filopodia projections. We did observe an increase in cell surface area of approximately



246 60%, however this was not statistically significant ( $P=0.09$ ;  $n=3$ ) (Figure 5C). Together, miR-1253  
247 regulate *WAVE2* in endothelial cells leading to changes in endothelial cell lamellipodia formation.  
248

## 249 **Discussion**

250 Together, our data indicate that a large number of genes within the actin cytoskeleton  
251 signaling pathway are differentially-expressed in PBMCs between AA and white hypertensive  
252 women, with nearly all of these genes exhibiting similar expression levels between normotensive AA  
253 and white women (Figure 2, Supp. Fig 1). This suggests that the DGE patterns associated with  
254 hypertension occur sometime as the disease process begins or after sustained exposure to elevated  
255 systemic blood pressure levels. Previously, we found similar patterns in additional pathways related  
256 to hypertension (Dluzen et al., 2016;Dluzen et al., 2017) providing further evidence that DGE is  
257 associated with individual gene expression levels in individuals with high blood pressure. Here, we  
258 found that miR-1253, identified in our previous analysis (Dluzen et al., 2016) but without a  
259 functionally-validated role in hypertension, was predicted to target *WAVE2* in the actin cytoskeleton  
260 pathway. This gene expression analysis in PBMCs led us to validate that miR-1253 can bind and  
261 regulate *WAVE2* expression in endothelial cells and influence actin cytoskeletal dynamic (Figures 4-  
262 5).

263 DGE within the actin cytoskeleton signaling pathway in hypertension has previously  
264 remained relatively unexplored, particularly in the context of AA women with hypertension. Most  
265 studies have examined the role of this pathway in downstream conditions of which hypertension is a  
266 major risk factor. Pathway analysis of gene expression in coronary artery atherosclerosis plaques  
267 identified that focal adhesion and actin cytoskeleton pathways as some of the most differentially-  
268 expressed between early and late-stage plaques (Tan et al., 2017). In human macrophages, *FLNA*  
269 expression is higher in advanced atherosclerotic plaques compared with intermediary plaques and  
270 inhibition of *FLNA* expression in mice reduced plaque development, suggesting a role for this gene  
271 and the actin cytoskeleton in hypertension-related CVDs (Bandaru et al., 2019). *FLNA* is expressed  
272 in human and mouse endothelial cells after myocardial infarction. When its expression is inhibited  
273 the endothelial response to cardiac repair, migration, and VEGF-A secretion was reduced and this  
274 promoted left ventricular dysfunction and heart failure (Bandaru et al., 2015). In our analysis, we  
275 found that AA women have higher levels of *FLNA* compared with white women which may suggest  
276 that additional members of this pathway are relevant in hypertension etiology and the development of  
277 end organ complications.

278 Altered levels of other members of the actin cytoskeleton signaling pathway have been  
279 observed but not in the context of gender or race. Bradykinin receptors 1 and 2, which act as  
280 upstream regulators of vessel wall remodeling, are significantly upregulated in peripheral monocytes  
281 of essential hypertensives and hypertension treatment reduces their expression (Marketou et al.,  
282 2014). The Rho/ROCK signaling cascade regulates organization of the actin cytoskeleton and cell  
283 morphology, including adhesion of cells along the endothelium of the vasculature (Byrne et al.,  
284 2016;Carbone et al., 2017;Narumiya and Thumkeo, 2018). Members of the RhoA family have been  
285 extensively examined as targets for hypertension therapy (Dee et al., 2019), and given its  
286 upregulation in AA women with hypertension [shown here and in (Dluzen et al., 2016)], the targeting  
287 of elevated *RHOA* expression and the downstream impact on cytoskeleton function may be a novel  
288 area for intervention in AA women. Follow-up studies are warranted to investigate this.

289 We identified differential expression of *WAVE2* between AA and white women with  
290 hypertension. *WAVE2* is an actin nucleation promoting factor and binds with the actin-related  
291 protein (Arp) 2/3 complex to promote actin filament nucleation and branching (Kang et al.,  
292 2010;Rotty et al., 2013). Variation in *WAVE2* expression modulates actin branching and influences  
293 the formation of cellular filopodia and lamellipodia (Innocenti et al., 2005;Beli et al., 2008;Rotty et  
294 al., 2013;Krause and Gautreau, 2014;Suarez and Kovar, 2016). We observed that repression of

295 *WAVE2* levels due to miR-1253 overexpression increased the formation of lamellipodia and  
296 membrane ruffling, consistent with lamellipodia formation and actin elongation dynamics related to  
297 *WAVE2* expression modulation (Krause and Gautreau, 2014).

298 Modification of *WAVE2* expression by miR-1253 in either circulating monocytes or in  
299 endothelial cells may be associated with hypertension-related changes in membrane physiology and  
300 morphology. Endothelial response to increase shear stress and laminar flow has been found to be  
301 associated with race. HUVECs isolated from AAs are more responsive to laminar shear stress  
302 compared with HUVECs from whites, including in pathways related to nitric oxide synthase and  
303 oxidative stress response. Importantly, in both cases, exercise was able to improve upon those  
304 changes (Fairheller et al., 2011; Babbitt et al., 2015). A recent meta-analysis of studies comparing  
305 arterial stiffness between AAs and whites identified significant differences in AAs in aortic femoral  
306 pulse wave velocity and carotid-femoral pulse wave velocity (Buie et al., 2019) and build off of  
307 previous analysis that AAs can have impaired microvascular dilatory response (Morris et al., 2013).  
308 Our findings here indicate that the actin cytoskeleton could influence or associate with these clinical  
309 observations and further consideration of the involvement of *WAVE2*, miR-1253, and related  
310 pathway genes will be important to identify any direct roles.

311 Our analysis identifies a novel regulatory role for miR-1253 and regulation of *WAVE2*.  
312 Previously, the only known role for miR-1253 has been found in cancer, where it regulates the  
313 expression of the long, non-coding RNA *FOXC2-AS1* in prostate cancer cells (Chen et al., 2019) and  
314 *WNT5A* in lung carcinoma (Liu et al., 2018). This study is limited because it is not known whether  
315 differential-expression of miR-1253 in AA women with hypertension is a contributing cause or an  
316 effect of elevated high blood pressure. There is no data in the literature examining whether changes  
317 in miR-1253 influence endothelial dysfunction via changes to the actin cytoskeleton and if these  
318 changes predispose individuals to atherosclerotic plaques or other hypertension-related  
319 complications. These questions were beyond the scope of this study. However, many miRNAs play  
320 an important role in the normal and disease physiology of the vasculature. For example, miR-155  
321 regulates endothelial *eNOS* and downstream vasodilation in human mammary arteries (Sun et al.,  
322 2012) and its expression is inversely correlated with target *AGTRI* expression in untreated  
323 hypertensives (Ceolotto et al., 2011). Several miRNAs, including miR-143 and miR-145, regulate  
324 vascular smooth muscle cell function and have been found to be differentially-expressed in PBMCs  
325 and correlated with 24-hr diastolic blood pressure and pulse pressure in individuals with hypertension  
326 (Kontaraki et al., 2014). It unknown if these miRNAs are correlated with disparities in hypertension,  
327 particularly in AA women, or involved in similar pathways as miR-1253.

328 Together, we have identified the actin cytoskeleton as a possible avenue to explore to further  
329 our understanding of how hypertension may develop and present in different populations.  
330 Importantly, we have identified a bioinformatic analysis pipeline that can identify and validate novel  
331 miRNA regulators for members of that pathway. Future studies will need to examine the *WAVE2*-  
332 miR-1253 relationship in order to further elucidate their role in hypertension and hypertension-  
333 related disparities.

## 334 335 **Materials and Methods**

336 *Study Participants.* Age-matched African American and white females who were either hypertensive  
337 (HT) or normotensive (NT) were previously chosen from the Healthy Aging in Neighborhoods of  
338 Diversity Across the Life Span (HANDLS) study of the National Institute on Aging Intramural  
339 Research Program (NIA IRP) of the National Institutes of Health (NIH) (Evans et al., 2010). The  
340 demographics and clinical information for this re-examined cohort are previously described in  
341 extensive detail in (Dluzen et al., 2016). The IRB of the National Institute of Environmental Health  
342 Studies, NIH, approved this study and all participants signed written informed consent.

343

## miR-1253 Regulates Endothelial WAVE2 Expression

344 *Microarray, Target Prediction, and Pathway Analysis.* Gene expression levels in PMBCs reanalyzed  
345 in this study were analyzed and quantified using the Illumina Beadchip HT-12 v4 (San Diego, CA) as  
346 described in (Dluzen et al., 2016) and can be found in the Gene Expression Omnibus ([GSE75672](#)).  
347 Gene expression in HAECs was analyzed using the Illumina Beadchip HT-12 v4 and RNA was  
348 prepared and labeled according to the manufacturer's protocol. Data were analyzed as previously  
349 performed (Dluzen et al., 2017) and outlying technical replicates were removed. Raw signals were  
350 analyzed by Z-score normalization (Cheadle et al., 2003) and individual genes with an average  
351 intensity >0, false discovery rate <0.2, *P*-value <0.05, and fold change >|1.5| were considered  
352 significant and these HAEC microarray datasets can be found in the Gene Expression Omnibus and  
353 will include our miR-1253 datasets ([GSE139286](#)). Gene expression data, including Z-ratio and fold-  
354 change, were imported into Ingenuity Pathway Analysis (IPA; Ingenuity Systems, Redwood City,  
355 CA) and we used default and custom settings to perform pathway analyses of genes significantly  
356 affected by miR-1253 over-expression and compared with a scrambled negative control. DIANA-  
357 Tarbase v7.0 (Vlachos et al., 2015) and TargetScan v7.2 (Agarwal et al., 2015) were used for miR-  
358 1253 target prediction.

359  
360 *Cell Culture and Transfection.* Primary human umbilical vein endothelial cells (HUVECs) were  
361 purchased and verified from Lonza and grown in EMB media supplemented with EGM- SingleQuot  
362 Kits (Lonza; Walkersville, MD). Primary human aortic endothelial cells (HAECs) were purchased  
363 from Lonza and grown in EMB-2 media supplemented with EGM-2 SingleQuot Kits (Lonza). Cells  
364 were transfected with miR-1253 Pre-miR miRNA Precursor (Assay ID #PM13220) or scrambled  
365 Pre-miR miRNA Precursor negative control #1 (Catalog #AM17110) (ThermoFisher, Waltham,  
366 MA). Mimics were transfected with Lipofectamine 2000 (ThermoFisher).

367  
368 *3' UTR Luciferase reporter assays.* Two miTarget miRNA 3' UTR plasmids were purchased from  
369 GenoCopeia (Rockville, MD) containing either the first (Catalog #Hmi088372a-MT06) or second  
370 halves (Catalog #Hmi088372b-MT06) of the *WAVE2* 3' UTR RNA sequencing. The miTarget  
371 plasmid vector (pEZ-X-MT06) contains a luciferase reporter gene with attached 3' UTRs of interest  
372 and downstream renilla luciferase for transfection efficiency controls. HUVECs were co-transfected  
373 with 50 ng of either *WAVE2* 3'UTR plasmid and with either 50 nM scrambled negative control or  
374 miR-1253 mimic. Forty-eight hours later, luciferase and renilla activities were measured using the  
375 Dual-Luciferase reporter assay system (Promega) according to manufacturer's instructions. Renilla  
376 served as an internal transfection control and the ratio of luciferase/renilla was normalized to the  
377 scrambled control. All luciferase assays were measured using a Synergy HT Microplate Reader  
378 (BioTek, Winooski, VT) and performed in triplicate.

379  
380 *RNA Isolation and RT-qPCR.* Total RNA was isolated from HAECs and HUVECs using Trizol  
381 Reagents (ThermoFisher) with phenol/chloroform extraction according to manufacturer's protocol.  
382 RNA integrity was measured with a Nanodrop 2000 and cDNA was synthesized using random  
383 hexamers and Super Script II reverse transcriptase (Invitrogen, Carlsbad, CA). miRNA cDNA was  
384 synthesized using the QuantiMiR RT Kit and the provided universal reverse primer (Systems  
385 Biosciences, Mountain View, CA). All RT-qPCR reactions were performed with 2x SYBR green  
386 master mix (ThermoFisher) on either an Applied Biosystems model 7500 real-time PCR machine or  
387 a QuantStudio 6 Flex. miR-1253 levels were normalized to *U6* and *WAVE2* levels were normalized  
388 to the average of *GAPDH* and *ACTB*. The following primers (forward and reverse) were used for  
389 each gene: miR-1253 forward 5'-AGAGAAGAAGATCAGCCTGCA-3'; *U6* forward 5'-  
390 CGCAAGGATGACACGCAAATTC-3'; *WAVE2* forward 5'- GCAGCATTGGCTGTGTTGAA-  
391 3' and reverse 5'-GGTTGTCCACTGGGTAAGTGA-3'; *ACTB* forward 5'-  
392 GGACTTCGAGCAAGAGATGG-3' and reverse 5'-AGCACTGTGTTGGCGTACAG-3'; *GAPDH*



393 forward 5'-GCTCCTCCTGTTTCGACAGTCA-3' and reverse 5'-ACCTTCCCCATGGTGTCTGA-  
394 3'. Gene expression levels were calculated using the  $2^{-\Delta\Delta Ct}$  methodology (Livak and Schmittgen,  
395 2001).

396  
397 *Western blot analysis.* HAECs and HUVECs were washed 2x with cold PBS and then lysed in 2x  
398 Laemmli sample buffer on ice. Protein lysate was then loaded into a 10% polyacrylamide gel and  
399 separated. Protein levels were determined by anti-WAVE2 (sc-373889; Santa Cruz Biotechnology,  
400 Dallas, TX), anti-GAPDH (c-32233; Santa Cruz), and anti-ACTB (sc-1616; Santa Cruz) antibodies.  
401 Densitometry was performed using ImageJ software (Schneider et al., 2012).

402  
403 *Immunofluorescence and Scoring of Cells with Lamellipodia and Filopodia.* HUVECs were fixed in  
404 formaldehyde on glass slides and permeabilized in Triton-X. Cells were stained with Rhodamine  
405 Phalloidin (1:300) (Life Technologies), then with DAPI (1:10,000) and then mounted using ProLong  
406 (ThermoFisher Scientific). HUVECs were scored positive for the presence of lamellipodia if they  
407 displayed at least one actin-rich (phalloidin positive) ruffled structure at the edge of the cell.  
408 Filopodia were scored positive if at least two actin-positive finger-like protrusions were observed  
409 emanating from the cell. We used a Zeiss Observer D1 microscope with an AxioCam1Cc1 camera.  
410 Only cells that were either isolated or only attached to one other cell were counted. The number of  
411 positive cells is shown as a ratio to all DAPI-stained cells and cell area was measured using  
412 AxioVision Rel 4.7 software. This approach was modified from (Beli et al., 2008).

413  
414 *Statistical Analysis.* The Student's *t*-test was used when comparing two groups unless otherwise  
415 indicated. A *p*-value of <0.05 was considered statistically significant and calculations were  
416 performed in Prism GraphPad v8.2.0, unless otherwise indicated.

#### 417 418 **Author Contributions**

419 Conceived and designed the experiments: M.A.A., N.N.H., M.K.E., and D.F.D. Performed the  
420 experiments: M.A.A., N.N.H., Y.Z., A.N.H., L.B.S., D.F.D. Analyzed the data: M.A.A, N.N.H.,  
421 Y.Z., A.N.H, L.B.B., M.K.E., and D.F.D. Wrote the paper: M.A.A., N.N.H., and D.F.D. Contributed  
422 reagents/materials/analysis tools: N.N.H., Y.Z., M.K.E., and D.F.D. All authors reviewed the  
423 manuscript.

#### 424 425 **Conflicts of Interest**

426 The authors declare that the research was conducted in the absence of any commercial or financial  
427 relationships that could be construed as a potential conflict of interest.

#### 428 429 **Contributions to the Field**

430 Hypertension disproportionately predisposes African American women to significant morbidity and  
431 mortality. However, there has been few studies exploring the possible role of differential gene  
432 expression for this race-based health disparity. One of the underlying factors may stem from the  
433 differences in the levels of expression of genes and microRNAs in African America women in  
434 genetic pathways related to hypertension and related diseases. We propose that the differential  
435 expression of a hypertension-related microRNA, miR-1253, regulates the expression levels of  
436 WAVE2, which underlies actin cytoskeletal changes in cells lining arterial blood vessels. The actin  
437 cytoskeleton regulates cellular shape, adhesions to other cells, and also cell movement. We also  
438 found that other genes involved with the actin cytoskeleton pathway are differentially-expressed in  
439 AA women. This is the first study linking WAVE2 and miR-1253 and to hypertension in AA women.  
440 Exploring the relationship between microRNAs and the genes which are affected in hypertension-

441 related pathways may lead to better treatment for hypertensive patients, especially those in the  
442 African American community.

443

#### 444 **Funding**

445 This work was supported by NIMHD RCMI@Morgan #U54MD013367-8281, the NIA Intramural  
446 Research Program (AG000519), NIGMS RISE #R25GM058904, and NIGMS ASCEND  
447 #TL4GM118974.

448

#### 449 **Acknowledgements**

450 We thank Dr. Simonetta Camandola for the use of the luminometer for the luciferase assay readings  
451 and Dr. Elin Lehrmann for assistance with our microarray. We thank Althaf Lohani for preparing  
452 materials for the luciferase assays and for RNA isolations. We thank the HANDLS staff for their  
453 critical evaluation of HANDLS participants.

454

#### 455 **Data Availability Statement**

456 The datasets analyzed for this study can be found in the Gene Expression Omnibus ([GSE75672](#)) and  
457 ([GSE139286](#)).

458

#### 459 **Figure Legends**

460

461 **Figure 1: Target prediction analysis for miR-1253.** (A) Venn diagram of miR-1253 predicted  
462 mRNA targets overlapping between the DIANA-Tarbase and TargetScan algorithms. (B) Venn  
463 diagram of overlapping, predicted miR-1253 targets that are differentially expressed in PBMCs  
464 identified in (Dluzen et al., 2016). (C) Venn diagram of miR-1253 predicted targets that are  
465 significantly, differentially-expressed in PBMCs and within hypertension-related pathways identified  
466 using Ingenuity Pathway Analysis (IPA). (D) List of significant Top Diseases and Disorders (Top)  
467 and Molecular and Cellular Functions (Bottom) in HAECs transfected with 50 nM miR-1253 mimic.  
468 These pathways were identified by Ingenuity Pathway Analysis.

469

470 **Figure 2: Gene expression analysis of the actin cytoskeleton in hypertensive women.** Microarray  
471 gene expression fold-changes in PBMCs isolated from AANT, WNT, AAHT, and WHT were  
472 imported into Ingenuity Pathway Analysis (IPA) and overlaid onto the actin cytoskeleton pathway.  
473 Red indicates significantly up-regulated expression and green indicates significant down-regulation  
474 in AANT compared with WNT (A) and in AAHT compared with WHT (B). Grey indicates a non-  
475 significant difference and white indicates no data available. All fold changes and P-values are listed  
476 for each gene and each comparison in Supplementary Table 1. AANT: African American  
477 normotensive women; AAHT: African American hypertensive women; WNT: White normotensive  
478 women; WHT: White hypertensive women.

479

480 **Figure 3: miR-1253 targeting of the WAVE2 3'UTR.** (A) Schematic of the miRTarget WAVE2 3'  
481 UTR vectors (plasmid 1 and 2). The predicted binding sites of miR-1253 to WAVE2 3'UTR are  
482 indicated in red with designated base pair positions. (B) Base pair schematic of binding site #3 of  
483 miR-1253 to the 3' UTR region of WAVE2 as predicted by TargetScan. (C) The relative expression  
484 of luciferase (Luc) reporter in the presence of 50 nM miR-1253 for 48 hrs and compared with  
485 scrambled control. Data were normalized to an internal renilla control and normalized to 1.0.  
486  $**P<0.01$ ;  $**P<0.001$ , by two-tailed student's T-test.

487

488 **Figure 4: Overexpression of miR-1253 in HAECs and HUVECs reduces expression of WAVE2.**

489 50 nM miR-1253 was transfected into HAECs (n=3) (A) and HUVECs (n=5) (B) for 48 hrs and over-  
490 expressed in each cell line compared with a scrambled negative control mimic (scr.; top left). WAVE2  
491 expression was normalized to *GAPDH* in each cell line and shown relative to scrambled (scr.; top  
492 right). WAVE2 proteins levels were normalized to Beta Actin (HAECs) or *GAPDH* (HUVECs) and  
493 shown relative to a scrambled control (scr.; bottom left). Representative immunoblots are shown for  
494 WAVE2 and loading controls in each cell line (bottom right) \* $P < 0.05$ , \*\* $P < 0.01$ , \*\*\* $P < 0.001$ , by  
495 one-tailed T-test (for confirmation of miR-1253 expression levels in each cell line) or two-tailed  
496 student's T-test for all comparisons of mRNA and protein levels.  
497

498 **Figure 5: miR-1253 increases lamellipodia in HUVECs.** (A) Representative pictures of HUVECs  
499 transfected with either scrambled control mimics (scr., left panel) or miR-1253 (right panel) and  
500 stained with rhodamine phalloidin for actin filaments and DAPI for nuclei visualization. (B) Percent  
501 of cells visualized and counted for filopodia or lamellipodia in cells transfected with the scrambled or  
502 miR-1253 mimic versus total number of DAPI-stained cells (n=3). (C) Quantitation of cell surface  
503 area of HUVECs transfected with the scr. control or miR-1253 mimic (n=3). \*\* $P < 0.01$ , # $P = 0.09$ ;  
504 Two-tailed student's T-test. Scale bar = 10  $\mu\text{m}$ .  
505

## 506 References

- 507 Agarwal, V., Bell, G.W., Nam, J.W., and Bartel, D.P. (2015). Predicting effective microRNA target  
508 sites in mammalian mRNAs. *Elife* 4.
- 509 Babbitt, D.M., Kim, J.S., Forrester, S.J., Brown, M.D., and Park, J.Y. (2015). Effect of Interleukin-10  
510 and Laminar Shear Stress on Endothelial Nitric Oxide Synthase and Nitric Oxide in African  
511 American Human Umbilical Vein Endothelial Cells. *Ethn Dis* 25, 413-418.
- 512 Bandaru, S., Ala, C., Salimi, R., Akula, M.K., Ekstrand, M., Devarakonda, S., Karlsson, J., Van Den  
513 Eynden, J., Bergstrom, G., Larsson, E., Levin, M., Boren, J., Bergo, M.O., and Akyurek, L.M.  
514 (2019). Targeting Filamin A Reduces Macrophage Activity and Atherosclerosis. *Circulation*  
515 140, 67-79.
- 516 Bandaru, S., Gronros, J., Redfors, B., Cil, C., Pazooki, D., Salimi, R., Larsson, E., Zhou, A.X.,  
517 Omerovic, E., and Akyurek, L.M. (2015). Deficiency of filamin A in endothelial cells impairs  
518 left ventricular remodelling after myocardial infarction. *Cardiovasc Res* 105, 151-159.
- 519 Beli, P., Mascheroni, D., Xu, D., and Innocenti, M. (2008). WAVE and Arp2/3 jointly inhibit  
520 filopodium formation by entering into a complex with mDia2. *Nat Cell Biol* 10, 849-857.
- 521 Benjamin, E.J., Muntner, P., Alonso, A., Bittencourt, M.S., Callaway, C.W., Carson, A.P.,  
522 Chamberlain, A.M., Chang, A.R., Cheng, S., Das, S.R., Delling, F.N., Djousse, L., Elkind,  
523 M.S.V., Ferguson, J.F., Fornage, M., Jordan, L.C., Khan, S.S., Kissela, B.M., Knutson, K.L.,  
524 Kwan, T.W., Lackland, D.T., Lewis, T.T., Lichtman, J.H., Longenecker, C.T., Loop, M.S.,  
525 Lutsey, P.L., Martin, S.S., Matsushita, K., Moran, A.E., Mussolino, M.E., O'flaherty, M.,  
526 Pandey, A., Perak, A.M., Rosamond, W.D., Roth, G.A., Sampson, U.K.A., Satou, G.M.,  
527 Schroeder, E.B., Shah, S.H., Spartano, N.L., Stokes, A., Tirschwell, D.L., Tsao, C.W.,  
528 Turakhia, M.P., Vanwagner, L.B., Wilkins, J.T., Wong, S.S., Virani, S.S., American Heart  
529 Association Council On, E., Prevention Statistics, C., and Stroke Statistics, S. (2019). Heart  
530 Disease and Stroke Statistics-2019 Update: A Report From the American Heart Association.  
531 *Circulation* 139, e56-e528.
- 532 Buie, J.N.J., Stanley, A., Nietert, P.J., Logan, A., Adams, R.J., and Magwood, G.S. (2019). Racial  
533 Disparities in Arterial Stiffness Between Healthy Whites and African Americans in the  
534 United States: A Meta-analysis. *J Natl Med Assoc* 111, 7-17.

## miR-1253 Regulates Endothelial WAVE2 Expression

- 535 Byrne, K.M., Monsefi, N., Dawson, J.C., Degasperi, A., Bukowski-Wills, J.C., Volinsky, N.,  
536 Dobrzynski, M., Birtwistle, M.R., Tsyganov, M.A., Kiyatkin, A., Kida, K., Finch, A.J.,  
537 Carragher, N.O., Kolch, W., Nguyen, L.K., Von Kriegsheim, A., and Kholodenko, B.N.  
538 (2016). Bistability in the Rac1, PAK, and RhoA Signaling Network Drives Actin  
539 Cytoskeleton Dynamics and Cell Motility Switches. *Cell Syst* 2, 38-48.
- 540 Carbone, M.L., Chadeuf, G., Heurtebise-Chretien, S., Prieur, X., Quillard, T., Goueffic, Y., Vaillant,  
541 N., Rio, M., Castan, L., Durand, M., Baron-Menguy, C., Aureille, J., Desfrancois, J., Tesse,  
542 A., Torres, R.M., and Loirand, G. (2017). Leukocyte RhoA exchange factor Arhgef1  
543 mediates vascular inflammation and atherosclerosis. *J Clin Invest* 127, 4516-4526.
- 544 Ceolotto, G., Papparella, I., Bortoluzzi, A., Strapazon, G., Ragazzo, F., Bratti, P., Fabricio, A.S.,  
545 Squarcina, E., Gion, M., Palatini, P., and Semplicini, A. (2011). Interplay between miR-155,  
546 AT1R A1166C polymorphism, and AT1R expression in young untreated hypertensives. *Am J*  
547 *Hypertens* 24, 241-246.
- 548 Cheadle, C., Vawter, M.P., Freed, W.J., and Becker, K.G. (2003). Analysis of microarray data using  
549 Z score transformation. *J Mol Diagn* 5, 73-81.
- 550 Chen, Y., Gu, M., Liu, C., Wan, X., Shi, Q., Chen, Q., and Wang, Z. (2019). Long noncoding RNA  
551 FOXC2-AS1 facilitates the proliferation and progression of prostate cancer via targeting miR-  
552 1253/EZH2. *Gene* 686, 37-42.
- 553 Davies, P.F. (2009). Hemodynamic shear stress and the endothelium in cardiovascular  
554 pathophysiology. *Nat Clin Pract Cardiovasc Med* 6, 16-26.
- 555 Dee, R.A., Mangum, K.D., Bai, X., Mack, C.P., and Taylor, J.M. (2019). Druggable targets in the  
556 Rho pathway and their promise for therapeutic control of blood pressure. *Pharmacol Ther*  
557 193, 121-134.
- 558 Dluzen, D.F., Kim, Y., Bastian, P., Zhang, Y., Lehrmann, E., Becker, K.G., Noren Hooten, N., and  
559 Evans, M.K. (2017). MicroRNAs Modulate Oxidative Stress in Hypertension through PARP-  
560 1 Regulation. *Oxid Med Cell Longev* 2017, 3984280.
- 561 Dluzen, D.F., Noren Hooten, N., Zhang, Y., Kim, Y., Glover, F.E., Tajuddin, S.M., Jacob, K.D.,  
562 Zonderman, A.B., and Evans, M.K. (2016). Racial differences in microRNA and gene  
563 expression in hypertensive women. *Sci Rep* 6, 35815.
- 564 Evans, M.K., Lepkowski, J.M., Powe, N.R., Laveist, T., Kuczumarski, M.F., and Zonderman, A.B.  
565 (2010). Healthy aging in neighborhoods of diversity across the life span (HANDLS):  
566 overcoming barriers to implementing a longitudinal, epidemiologic, urban study of health,  
567 race, and socioeconomic status. *Ethn Dis* 20, 267-275.
- 568 Fearheller, D.L., Park, J.Y., Rizzo, V., Kim, B., and Brown, M.D. (2011). Racial differences in the  
569 responses to shear stress in human umbilical vein endothelial cells. *Vasc Health Risk Manag*  
570 7, 425-431.
- 571 Gardner, A.W., Parker, D.E., Montgomery, P.S., Sosnowska, D., Casanegra, A.I., Ungvari, Z.,  
572 Csiszar, A., and Sonntag, W.E. (2015). Gender and racial differences in endothelial oxidative  
573 stress and inflammation in patients with symptomatic peripheral artery disease. *J Vasc Surg*  
574 61, 1249-1257.
- 575 Hergenreider, E., Heydt, S., Treguer, K., Boettger, T., Horrevoets, A.J., Zeiher, A.M., Scheffer, M.P.,  
576 Frangakis, A.S., Yin, X., Mayr, M., Braun, T., Urbich, C., Boon, R.A., and Dimmeler, S.



- 577 (2012). Atheroprotective communication between endothelial cells and smooth muscle cells  
578 through miRNAs. *Nat Cell Biol* 14, 249-256.
- 579 Innocenti, M., Gerboth, S., Rottner, K., Lai, F.P., Hertzog, M., Stradal, T.E., Frittoli, E., Didry, D.,  
580 Polo, S., Disanza, A., Benesch, S., Di Fiore, P.P., Carlier, M.F., and Scita, G. (2005). Abi1  
581 regulates the activity of N-WASP and WAVE in distinct actin-based processes. *Nat Cell Biol*  
582 7, 969-976.
- 583 Iskratsch, T., Wolfenson, H., and Sheetz, M.P. (2014). Appreciating force and shape-the rise of  
584 mechanotransduction in cell biology. *Nat Rev Mol Cell Biol* 15, 825-833.
- 585 Jusic, A., Devaux, Y., and Action, E.U.-C.C. (2019). Noncoding RNAs in Hypertension.  
586 *Hypertension* 74, 477-492.
- 587 Kang, H., Wang, J., Longley, S.J., Tang, J.X., and Shaw, S.K. (2010). Relative actin nucleation  
588 promotion efficiency by WASP and WAVE proteins in endothelial cells. *Biochem Biophys*  
589 *Res Commun* 400, 661-666.
- 590 Kontaraki, J.E., Marketou, M.E., Zacharis, E.A., Parthenakis, F.I., and Vardas, P.E. (2014).  
591 Differential expression of vascular smooth muscle-modulating microRNAs in human  
592 peripheral blood mononuclear cells: novel targets in essential hypertension. *J Hum Hypertens*  
593 28, 510-516.
- 594 Krause, M., and Gautreau, A. (2014). Steering cell migration: lamellipodium dynamics and the  
595 regulation of directional persistence. *Nat Rev Mol Cell Biol* 15, 577-590.
- 596 Kriegel, A.J., Baker, M.A., Liu, Y., Liu, P., Cowley, A.W., Jr., and Liang, M. (2015). Endogenous  
597 microRNAs in human microvascular endothelial cells regulate mRNAs encoded by  
598 hypertension-related genes. *Hypertension* 66, 793-799.
- 599 Liang, J., Le, T.H., Edwards, D.R.V., Tayo, B.O., Gaulton, K.J., Smith, J.A., Lu, Y., Jensen, R.A.,  
600 Chen, G., Yanek, L.R., Schwander, K., Tajuddin, S.M., Sofer, T., Kim, W., Kayima, J.,  
601 Mckenzie, C.A., Fox, E., Nalls, M.A., Young, J.H., Sun, Y.V., Lane, J.M., Cechova, S.,  
602 Zhou, J., Tang, H., Fornage, M., Musani, S.K., Wang, H., Lee, J., Adeyemo, A., Dreisbach,  
603 A.W., Forrester, T., Chu, P.L., Cappola, A., Evans, M.K., Morrison, A.C., Martin, L.W.,  
604 Wiggins, K.L., Hui, Q., Zhao, W., Jackson, R.D., Ware, E.B., Faul, J.D., Reiner, A.P., Bray,  
605 M., Denny, J.C., Mosley, T.H., Palmas, W., Guo, X., Papanicolaou, G.J., Penman, A.D.,  
606 Polak, J.F., Rice, K., Taylor, K.D., Boerwinkle, E., Bottinger, E.P., Liu, K., Risch, N., Hunt,  
607 S.C., Kooperberg, C., Zonderman, A.B., Laurie, C.C., Becker, D.M., Cai, J., Loos, R.J.F.,  
608 Psaty, B.M., Weir, D.R., Kardia, S.L.R., Arnett, D.K., Won, S., Edwards, T.L., Redline, S.,  
609 Cooper, R.S., Rao, D.C., Rotter, J.I., Rotimi, C., Levy, D., Chakravarti, A., Zhu, X., and  
610 Franceschini, N. (2017). Single-trait and multi-trait genome-wide association analyses  
611 identify novel loci for blood pressure in African-ancestry populations. *PLoS Genet* 13,  
612 e1006728.
- 613 Liu, M., Zhang, Y., Zhang, J., Cai, H., Zhang, C., Yang, Z., Niu, Y., Wang, H., Wei, X., Wang, W.,  
614 Gao, P., Li, H., Zhang, J., and Sun, G. (2018). MicroRNA-1253 suppresses cell proliferation  
615 and invasion of non-small-cell lung carcinoma by targeting WNT5A. *Cell Death Dis* 9, 189.
- 616 Livak, K.J., and Schmittgen, T.D. (2001). Analysis of relative gene expression data using real-time  
617 quantitative PCR and the 2(-Delta Delta C(T)) Method. *Methods* 25, 402-408.
- 618 Marketou, M.E., Kontaraki, J., Zacharis, E., Parthenakis, F., Maragkoudakis, S., Gavras, I., Gavras,  
619 H., and Vardas, P.E. (2014). Differential gene expression of bradykinin receptors 1 and 2 in

- 620 peripheral monocytes from patients with essential hypertension. *J Hum Hypertens* 28, 450-  
621 455.
- 622 Moayed, Y., Fan, C.S., Miller, R.J.H., Tremblay-Gravel, M., Posada, J.G.D., Manlhiot, C., Hiller,  
623 D., Yee, J., Woodward, R., Mccaughan, J.A., Shullo, M.A., Hall, S.A., Pinney, S., Khush,  
624 K.K., Ross, H.J., and Teuteberg, J.J. (2019). Gene expression profiling and racial disparities  
625 in outcomes after heart transplantation. *J Heart Lung Transplant* 38, 820-829.
- 626 Morris, A.A., Patel, R.S., Binongo, J.N., Poole, J., Al Mheid, I., Ahmed, Y., Stoyanova, N.,  
627 Vaccarino, V., Din-Dzietham, R., Gibbons, G.H., and Quyyumi, A. (2013). Racial differences  
628 in arterial stiffness and microcirculatory function between Black and White Americans. *J Am*  
629 *Heart Assoc* 2, e002154.
- 630 Mukherji, S., Ebert, M.S., Zheng, G.X., Tsang, J.S., Sharp, P.A., and Van Oudenaarden, A. (2011).  
631 MicroRNAs can generate thresholds in target gene expression. *Nat Genet* 43, 854-859.
- 632 Narumiya, S., and Thumkeo, D. (2018). Rho signaling research: history, current status and future  
633 directions. *FEBS Lett* 592, 1763-1776.
- 634 Nedelec, Y., Sanz, J., Baharian, G., Szpiech, Z.A., Pacis, A., Dumaine, A., Grenier, J.C., Freiman,  
635 A., Sams, A.J., Hebert, S., Page Sabourin, A., Luca, F., Blekhman, R., Hernandez, R.D.,  
636 Pique-Regi, R., Tung, J., Yotova, V., and Barreiro, L.B. (2016). Genetic Ancestry and Natural  
637 Selection Drive Population Differences in Immune Responses to Pathogens. *Cell* 167, 657-  
638 669 e621.
- 639 Ness, R.B., Haggerty, C.L., Harger, G., and Ferrell, R. (2004). Differential distribution of allelic  
640 variants in cytokine genes among African Americans and White Americans. *Am J Epidemiol*  
641 160, 1033-1038.
- 642 Patel, S.A., Winkel, M., Ali, M.K., Narayan, K.M., and Mehta, N.K. (2015). Cardiovascular  
643 mortality associated with 5 leading risk factors: national and state preventable fractions  
644 estimated from survey data. *Ann Intern Med* 163, 245-253.
- 645 Rotty, J.D., Wu, C., and Bear, J.E. (2013). New insights into the regulation and cellular functions of  
646 the ARP2/3 complex. *Nat Rev Mol Cell Biol* 14, 7-12.
- 647 Schneider, C.A., Rasband, W.S., and Eliceiri, K.W. (2012). NIH Image to ImageJ: 25 years of image  
648 analysis. *Nat Methods* 9, 671-675.
- 649 Schober, A., Nazari-Jahantigh, M., Wei, Y., Bidzhekov, K., Gremse, F., Grommes, J., Megens, R.T.,  
650 Heyll, K., Noels, H., Hristov, M., Wang, S., Kiessling, F., Olson, E.N., and Weber, C. (2014).  
651 MicroRNA-126-5p promotes endothelial proliferation and limits atherosclerosis by  
652 suppressing Dlk1. *Nat Med* 20, 368-376.
- 653 Shi, L., and Fleming, I. (2012). One miR level of control: microRNA-155 directly regulates  
654 endothelial nitric oxide synthase mRNA and protein levels. *Hypertension* 60, 1381-1382.
- 655 Spindler, V., Schlegel, N., and Waschke, J. (2010). Role of GTPases in control of microvascular  
656 permeability. *Cardiovasc Res* 87, 243-253.
- 657 Suarez, C., and Kovar, D.R. (2016). Intenetwork competition for monomers governs actin  
658 cytoskeleton organization. *Nat Rev Mol Cell Biol* 17, 799-810.
- 659 Sun, H.X., Zeng, D.Y., Li, R.T., Pang, R.P., Yang, H., Hu, Y.L., Zhang, Q., Jiang, Y., Huang, L.Y.,  
660 Tang, Y.B., Yan, G.J., and Zhou, J.G. (2012). Essential role of microRNA-155 in regulating  
661 endothelium-dependent vasorelaxation by targeting endothelial nitric oxide synthase.  
662 *Hypertension* 60, 1407-1414.

- 663 Tan, X., Zhang, X., Pan, L., Tian, X., and Dong, P. (2017). Identification of Key Pathways and  
 664 Genes in Advanced Coronary Atherosclerosis Using Bioinformatics Analysis. *Biomed Res Int*  
 665 2017, 4323496.
- 666 Thames, A.D., Irwin, M.R., Breen, E.C., and Cole, S.W. (2019). Experienced discrimination and  
 667 racial differences in leukocyte gene expression. *Psychoneuroendocrinology* 106, 277-283.
- 668 Vlachos, I.S., Paraskevopoulou, M.D., Karagkouni, D., Georgakilas, G., Vergoulis, T., Kanellos, I.,  
 669 Anastasopoulos, I.L., Maniou, S., Karathanou, K., Kalfakakou, D., Fevgas, A., Dalamagas,  
 670 T., and Hatzigeorgiou, A.G. (2015). DIANA-TarBase v7.0: indexing more than half a million  
 671 experimentally supported miRNA:mRNA interactions. *Nucleic Acids Res* 43, D153-159.
- 672 Wang, B.D., Ceniccola, K., Yang, Q., Andrawis, R., Patel, V., Ji, Y., Rhim, J., Olender, J.,  
 673 Popratiloff, A., Latham, P., Lai, Y., Patierno, S.R., and Lee, N.H. (2015). Identification and  
 674 Functional Validation of Reciprocal microRNA-mRNA Pairings in African American  
 675 Prostate Cancer Disparities. *Clin Cancer Res* 21, 4970-4984.

676 **Table 1: Summary of miR-1253 Predict Targets Repressed in HAECs\***

677

| <b>Predicted miR-1253<br/>Targets (compared<br/>w/scrambled control)</b>                                                                                                                 | <b>FDR</b> | <b>Fold Change</b> | <b>P-Value</b> | <b>Z-Ratio</b> |
|------------------------------------------------------------------------------------------------------------------------------------------------------------------------------------------|------------|--------------------|----------------|----------------|
| ABCB10                                                                                                                                                                                   | 0.0172     | -1.53              | 0.0032         | -2.83          |
| ACO1                                                                                                                                                                                     | 0          | -7.58              | 0              | -11.94         |
| ACSL1                                                                                                                                                                                    | 0          | -1.69              | 0              | -3.32          |
| DCUN1D5                                                                                                                                                                                  | 0.0116     | -1.87              | 0.002          | -3.87          |
| DPYSL2                                                                                                                                                                                   | 0          | -1.61              | 0              | -2.47          |
| DUSP14                                                                                                                                                                                   | 0          | -2.13              | 0              | -4.46          |
| MSN                                                                                                                                                                                      | 0          | -1.83              | 0              | -3.15          |
| PARP1                                                                                                                                                                                    | 0          | -4.4               | 0              | -8.57          |
| PDE12                                                                                                                                                                                    | 0          | -2                 | 0              | -4.36          |
| POLA1                                                                                                                                                                                    | 0          | -1.53              | 0              | -2.82          |
| PTGER4                                                                                                                                                                                   | 0          | -1.72              | 0              | -3.05          |
| RAB27A                                                                                                                                                                                   | 0          | -2.06              | 0              | -4.5           |
| RSU1                                                                                                                                                                                     | 0          | -2.16              | 0              | -4.78          |
| RXRA                                                                                                                                                                                     | 0          | -1.54              | 0              | -2.61          |
| SEC62                                                                                                                                                                                    | 0          | -1.55              | 0              | -2.96          |
| SERINC3                                                                                                                                                                                  | 0          | -2.51              | 0              | -5.53          |
| SPARC                                                                                                                                                                                    | 0          | -1.91              | 0              | -3.55          |
| TFRC                                                                                                                                                                                     | 0          | -1.71              | 0              | -3.1           |
| TMEM127                                                                                                                                                                                  | 0          | -1.89              | 0              | -4.07          |
| TNS3                                                                                                                                                                                     | 0          | -1.83              | 0              | -3.68          |
| TOPBP1                                                                                                                                                                                   | 0          | -2.09              | 0              | -4.35          |
| UBE2N                                                                                                                                                                                    | 0.0005     | -1.56              | 0.0001         | -2.67          |
| WAVE2                                                                                                                                                                                    | 0          | -1.64              | 0              | -3.09          |
| *mRNAs also found to be significantly and differentially expressed in PMBCs in hypertensive AA and white women and with hypertension related pathways outlined in (Dluzen et al., 2016). |            |                    |                |                |

678

**Figure 1****A** Predicted miR-1253 TargetsDIANA-Tarbase TargetScan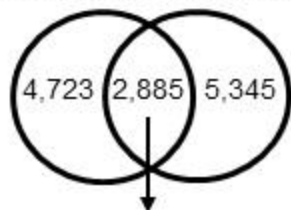**B** miR-1253 Targets DGE in PBMCs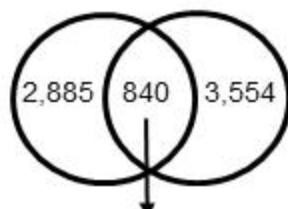**C** miR-1253 Targets Hypertension-Related Genes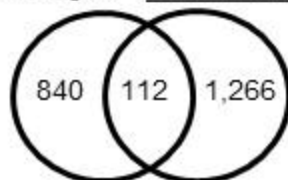**D**

| Top Diseases and Disorders                 |                     |                |
|--------------------------------------------|---------------------|----------------|
| Name                                       | p-value range       | # of Molecules |
| Infectious Diseases                        | 1.09E-02 – 1.28E-12 | 310            |
| Dermatological Diseases and Conditions     | 1.11E-02 – 1.28E-07 | 181            |
| <b>Cardiovascular Disease</b>              | 9.69E-03 – 3.52E-07 | 219            |
| Organismal Injury and Abnormalities        | 1.11E-02 – 3.52E-07 | 1728           |
| Reproductive System Disease                | 9.22E-03 – 3.52E-07 | 618            |
| Molecular and Cellular Functions           |                     |                |
| Name                                       | p-value range       | # of Molecules |
| Cell Death and Survival                    | 11.1E-02 – 3.82E-18 | 514            |
| <b>Cellular Growth and Proliferation</b>   | 1.09E-02 – 5.36E-17 | 521            |
| Cell Cycle                                 | 1.11E-02 – 4.51E-10 | 288            |
| <b>Cellular Assembly and Organization</b>  | 1.06E-02 – 4.51E-10 | 260            |
| DNA Replication, Recombination, and Repair | 1.06E-02 – 4.51E-10 | 193            |



**Figure 2****A**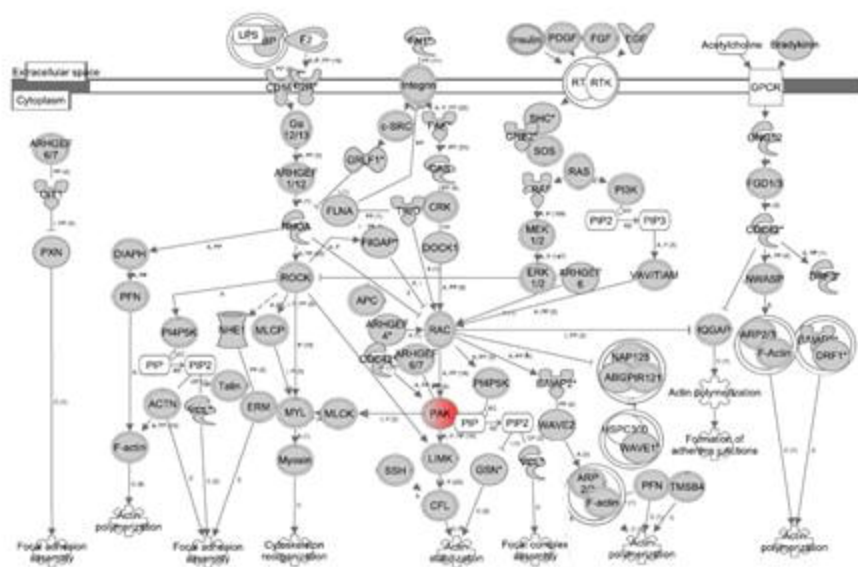**AANT vs. WNT****B**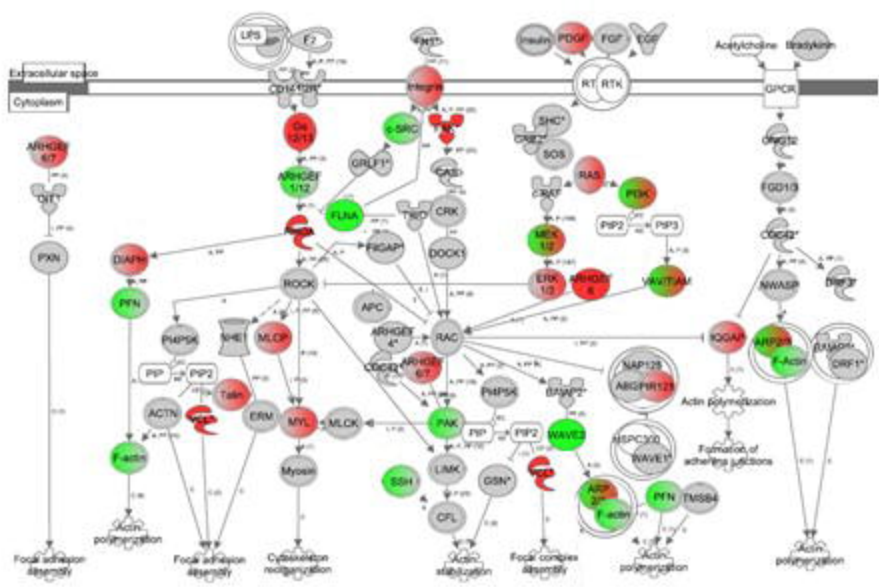**AAHT vs. WHT**

**Figure 3**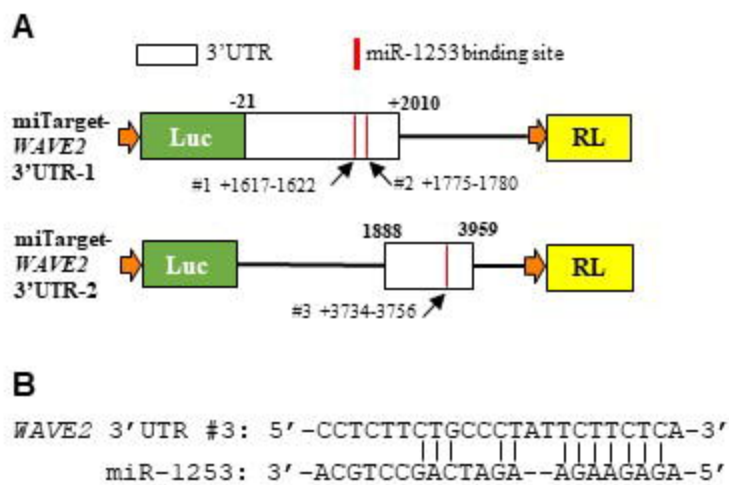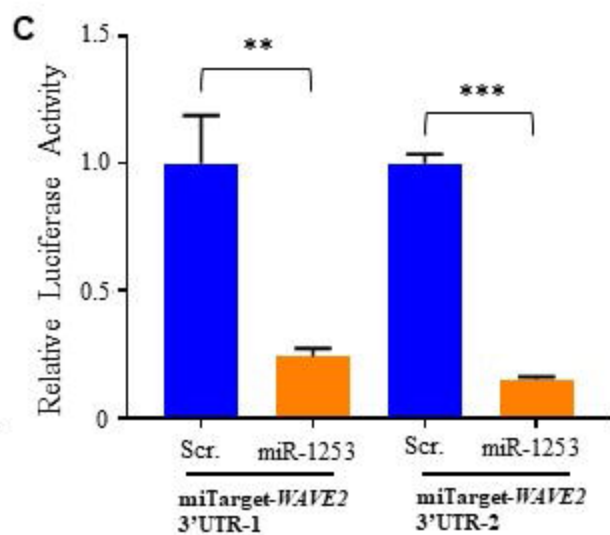

**Figure 4**

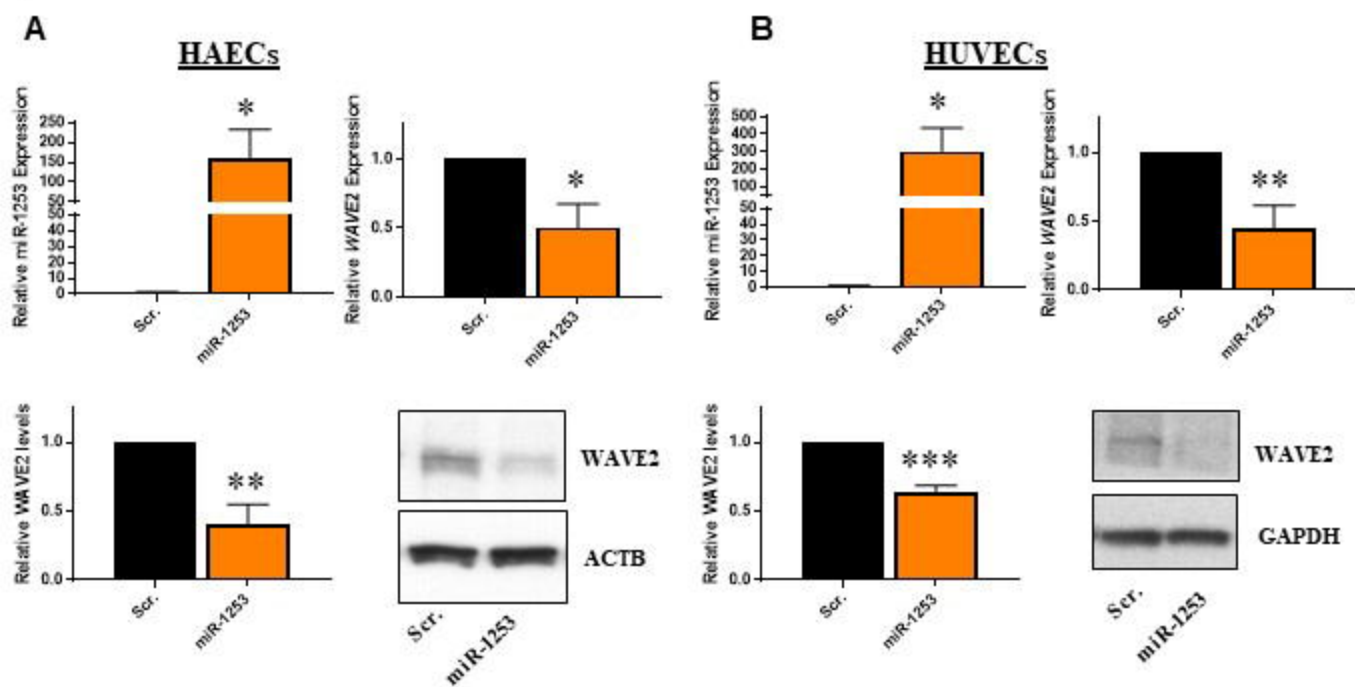

Figure 5

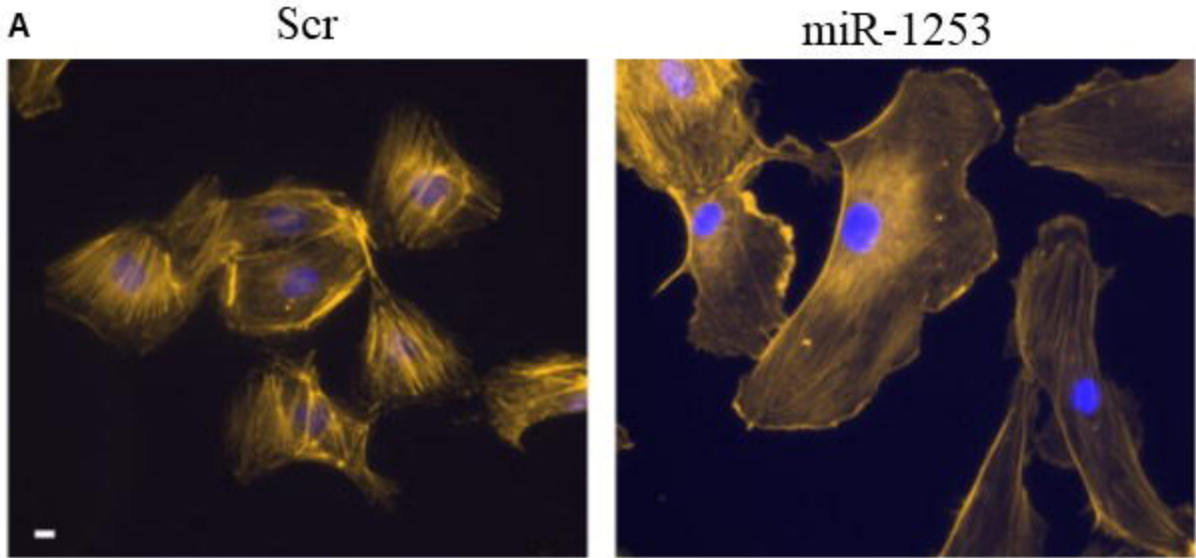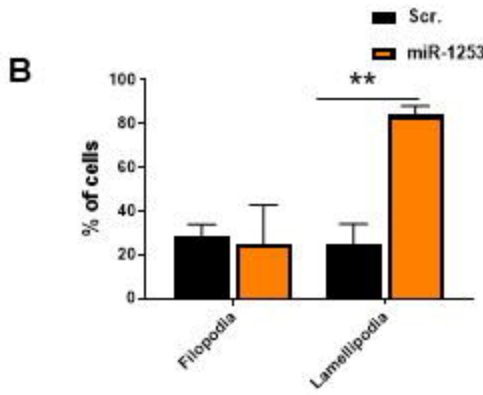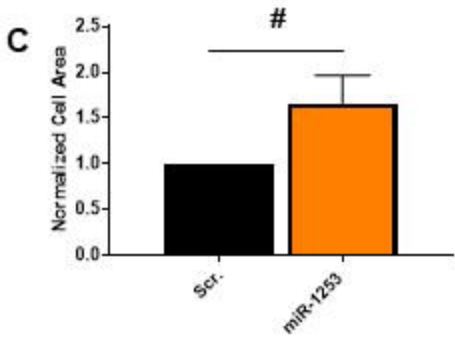

Source: https://www.biorxiv.org/content/10.1101/833673v1.full.pdf
