1 **MicroRNA 1253 regulation of WAVE2 and its relevance to health disparities in hypertension**

2  
3 **Mercy A. Arkorful<sup>1</sup>, Nicole Noren Hooten<sup>2</sup>, Yongqing Zhang<sup>3</sup>, Amirah N. Hewitt<sup>2</sup>, Lori**  
4 **Barrientos Sanchez<sup>2</sup>, Michele K. Evans<sup>2</sup>, Douglas F. Dluzen<sup>1\*</sup>**

5  
6 <sup>1</sup>Department of Biology, Morgan State University, Baltimore, Maryland, United States of America

7  
8 <sup>2</sup>Laboratory of Epidemiology and Population Science, National Institute on Aging, Baltimore,  
9 Maryland, United States of America

10  
11 <sup>3</sup>Laboratory of Genetics and Genomics, National Institute on Aging, Baltimore, Maryland, United  
12 States of America

13  
14 **\* Correspondence:**

15 Douglas F. Dluzen, PhD  
16 Morgan State University  
17 Spencer Hall, Room 111  
18 1700 E. Cold Spring Lane  
19 Baltimore, MD 21251  
20 443-885-4462  
21 douglas.dluzen@morgan.edu

22  
23  
24  
25  
26  
27  
28  
29  
30  
31  
32  
33  
34  
35  
36  
37  
38  
39  
40  
41  
42  
43  
44  
45  
46  
47

48 **Abstract**

49 The prevalence of hypertension among African Americans (AAs) in the US is among the highest of  
50 any demographic and affects over two-thirds of AA women. Previous data from our laboratory  
51 suggests substantial differential gene expression (DGE) of mRNAs and microRNAs (miRNAs) exists  
52 within peripheral blood mononuclear cells (PBMCs) isolated from AA and white women with or  
53 without hypertension. We hypothesized that DGE by race may contribute to racial differences in  
54 hypertension. We found that the Wiskott-Aldrich syndrome protein Verprolin homologous-2  
55 (*WAVE2*) is differentially-expressed in AA women with hypertension, along with several other  
56 members of the actin cytoskeleton signaling pathway that plays a role in cell shape and branching of  
57 actin filaments. We performed an *in silico* miRNA target prediction analysis that suggested miRNA  
58 miR-1253 regulates *WAVE2*. Transfection of miR-1253 mimics into human umbilical vein  
59 endothelial cells (HUVECs) and human aortic endothelial cells (HAECs) significantly repressed  
60 *WAVE2* mRNA and protein levels ( $P < 0.05$ ), and a luciferase reporter assay confirmed that miR-  
61 1253 regulates the *WAVE2* 3' UTR ( $P < 0.01$ ). miR-1253 over-expression in HUVECs significantly  
62 increased HUVEC lamellipodia formation ( $P < 0.01$ ), suggesting the miR-1253/*WAVE2* interaction  
63 may play a role in endothelial cell shape and actin cytoskeleton function. Together, we have  
64 identified novel roles for miR-1253 and *WAVE2* in a hypertension-related disparities context. This  
65 may ultimately lead to the discovery of additional actin-related genes which are important in the  
66 vascular-related complications of hypertension and influence the disproportionate susceptibility to  
67 hypertension among AAs in general and AA women in particular.

68  
69  
70  
71  
72  
73  
74  
75  
76  
77  
78  
79  
80  
81  
82  
83  
84  
85  
86  
87  
88  
89  
90  
91  
92  
93  
94  
95  
96

**Keywords: hypertension, differential gene expression, microRNA, actin cytoskeletal regulators, endothelial cell, health disparities African-American, women, race**

## 97 **Introduction**

98 Throughout the United States, systemic arterial hypertension and hypertension-related  
99 conditions, including coronary atherosclerotic heart disease and cerebrovascular disease, have  
100 disproportionate incidence, mortality, and morbidity among African Americans (AAs). AA women  
101 are at particular risk. Between 2013-2016, 66% of AA females over  $\geq 20$  yrs had hypertension,  
102 compared with 41.3% of non-Hispanic white women, 41% of Hispanic women, and 36% of Asian  
103 women [1]. Reducing or eliminating hypertension is predicted to reduce cardiovascular disease  
104 (CVD)-related mortality in women by almost 40% [1, 2]. While 75% of AA women are aware of  
105 having hypertension, only 26% of AA women were able to control their high blood pressure [1]. A  
106 deeper understanding of the underlying biological mechanisms associated with hypertension may  
107 help reduce the burden of this condition.

108 Differential gene expression (DGE) can be linked with ancestry and can influence how  
109 individuals respond to environmental stimuli and exposures [3, 4] and their susceptibility to chronic  
110 diseases, including cancer [5] and peripheral arterial disease (PAD) [6]. Investigations have shown  
111 that DGE can predict outcomes to medical procedures including heart transplants [7]. DGE patterns  
112 are also linked with sex and gender. We previously reported that there is substantial differential  
113 mRNA and microRNA expression of hypertension-related genes and pathways in peripheral blood  
114 mononuclear cells (PBMCs) between AA and white women with hypertension [8, 9]. We observed  
115 that genes in canonical pathways related to hypertension, such as the renin-angiotensin (RAS)  
116 pathway, are expressed in reciprocal directions that is dependent upon race [9]. A follow-up analysis  
117 of these results identified that poly-(ADP-ribose) polymerase 1 (PARP-1), a DNA damage sensor  
118 protein involved in DNA repair and other cellular processes, is upregulated in hypertensive AA  
119 women compared with white hypertensive women and contributes to cellular response to  
120 inflammation [8]. AA women with PAD also have elevated levels of endothelial oxidative stress and  
121 circulating inflammatory biomarkers compared with AA men with PAD [6] and these differences  
122 may influence disease outcomes in AA women.

123 Understanding not only the significance of DGE patterns in hypertension and CVDs, but also  
124 the underlying genetic mechanisms that regulate these patterns, will help further our understanding of  
125 the biological basis of these conditions. Expression of hypertension-related genes can be regulated by  
126 ancestral genomic polymorphisms and expression quantitative trait loci (eQTLs) [10, 11], but this  
127 does not account for all differences previously observed. This suggests alternative mechanisms also  
128 contribute to gene expression differences in different individuals. A possible contribution to  
129 variations in gene expression levels may arise from regulation from microRNAs.

130 MicroRNAs (miRNAs) are short (20-22 nucleotide), single-stranded RNAs that post-  
131 transcriptionally regulate protein expression by binding with target mRNA 3' untranslated regions  
132 (UTRs) and inhibiting translation, often by degrading the target mRNA [12]. miRNA regulation of  
133 protein expression is integral to the proper functioning and health of the endothelial tissues of the  
134 vasculature, underlying smooth muscle layers, and vascular-response to changes in shear stress [13-  
135 15]. Disruption of miRNA regulation of hypertension-related genes can lead to endothelial  
136 dysfunction [14, 16, 17]. We previously reported that nine miRNAs exhibit disease-or race-specific  
137 differential expression and we have identified and validated novel hypertension-related targets for  
138 eight of these miRNAs [8, 9].

139 Here, we sought to identify and validate novel hypertension-related targets for miR-1253,  
140 which is significantly downregulated in PBMCs of hypertensive AA women [9], but had remained  
141 unexplored in our prior analyses. We have reanalyzed our microarray dataset to further our  
142 understanding of DGE in hypertensive women in hypertension-related pathways [9]. We identified  
143 significant DGE among genes within the actin-cytoskeleton signaling pathway between hypertensive  
144 AA and white women and we have validated hypertension-related miR-1253 as a novel regulator of

145 WASP family Verprolin-homologous protein 2 (WAVE2), an integral member of the actin-  
146 cytoskeleton pathway.

147

148

149

## 150 **Materials and Methods**

151 *Study Participants.* Age-matched African American and white females who were either hypertensive  
152 (HT) or normotensive (NT) were previously chosen from the Healthy Aging in Neighborhoods of  
153 Diversity Across the Life Span (HANDLS) study of the National Institute on Aging Intramural  
154 Research Program (NIA IRP) of the National Institutes of Health (NIH) [18]. The demographics and  
155 clinical information for this re-examined cohort are previously described in extensive detail in [9].  
156 The IRB of the National Institute of Environmental Health Studies, NIH, approved this study and all  
157 participants signed written informed consent.

158

159 *Microarray, Target Prediction, and Pathway Analysis.* Gene expression levels in PMBCs reanalyzed  
160 in this study were analyzed and quantified using the Illumina Beadchip HT-12 v4 (San Diego, CA) as  
161 described in [9] and can be found in the Gene Expression Omnibus ([GSE75672](#)). Gene expression in  
162 HAECs was analyzed using the Illumina Beadchip HT-12 v4 and RNA was prepared and labeled  
163 according to the manufacturer's protocol. Data were analyzed as previously performed [8] and  
164 outlying technical replicates were removed. Raw signals were analyzed by Z-score normalization  
165 [19] and individual genes with an average intensity >0, false discovery rate <0.2, *P*-value <0.05, and  
166 fold change >|1.5| were considered significant and these HAEC microarray datasets can be found in  
167 the Gene Expression Omnibus and will include our miR-1253 datasets ([GSE139286](#)). Gene  
168 expression data, including Z-ratio and fold-change, were imported into Ingenuity Pathway Analysis  
169 (IPA; Ingenuity Systems, Redwood City, CA) and we used default and custom settings to perform  
170 pathway analyses of genes significantly affected by miR-1253 over-expression and compared with a  
171 scrambled negative control. DIANA-Tarbase v7.0 [20] and TargetScan v7.2 [21] were used for miR-  
172 1253 target prediction.

173

174 *Cell Culture and Transfection.* Primary human umbilical vein endothelial cells (HUVECs) were  
175 purchased and verified from Lonza and grown in EMB media supplemented with EGM- SingleQuot  
176 Kits (Lonza; Walkersville, MD). Primary human aortic endothelial cells (HAECs) were purchased  
177 from Lonza and grown in EMB-2 media supplemented with EGM-2 SingleQuot Kits (Lonza). Cells  
178 were transfected with miR-1253 Pre-miR miRNA Precursor (Assay ID #PM13220) or scrambled  
179 Pre-miR miRNA Precursor negative control #1 (Catalog #AM17110) (ThermoFisher, Waltham,  
180 MA). Mimics were transfected with Lipofectamine 2000 (ThermoFisher).

181

182 *3' UTR Luciferase reporter assays.* Two miTarget miRNA 3' UTR plasmids were purchased from  
183 GenoCopeia (Rockville, MD) containing either the first (Catalog #Hmi088372a-MT06) or second  
184 halves (Catalog #Hmi088372b-MT06) of the WAVE2 3' UTR RNA sequencing. The miTarget  
185 plasmid vector (pEZX-MT06) contains a luciferase reporter gene with attached 3' UTRs of interest  
186 and downstream renilla luciferase for transfection efficiency controls. HUVECs were co-transfected  
187 with 50 ng of either WAVE2 3'UTR plasmid and with either 50 nM scrambled negative control or  
188 miR-1253 mimic. Forty-eight hours later, luciferase and renilla activities were measured using the  
189 Dual-Luciferase reporter assay system (Promega) according to manufacturer's instructions. Renilla  
190 served as an internal transfection control and the ratio of luciferase/renilla was normalized to the  
191 scrambled control. All luciferase assays were measured using a Synergy HT Microplate Reader  
192 (BioTek, Winooski, VT) and performed in triplicate.

193

194 *RNA Isolation and RT-qPCR.* Total RNA was isolated from HAECs and HUVECs using Trizol  
195 Reagents (ThermoFisher) with phenol/chloroform extraction according to manufacturer's protocol.  
196 RNA integrity was measured with a Nanodrop 2000 and cDNA was synthesized using random  
197 hexamers and Super Script II reverse transcriptase (Invitrogen, Carlsbad, CA). miRNA cDNA was  
198 synthesized using the QuantiMiR RT Kit and the provided universal reverse primer (Systems  
199 Biosciences, Mountain View, CA). All RT-qPCR reactions were performed with 2x SYBR green  
200 master mix (ThermoFisher) on either an Applied Biosystems model 7500 real-time PCR machine or  
201 a QuantStudio 6 Flex. miR-1253 levels were normalized to *U6* and *WAVE2* levels were normalized  
202 to the average of *GAPDH* and *ACTB*. The following primers (forward and reverse) were used for  
203 each gene: miR-1253 forward 5'-AGAGAAGAAGATCAGCCTGCA-3'; *U6* forward 5'-  
204 CGCAAGGATGACACGCAAATTC-3'; *WAVE2* forward 5'- GCAGCATTGGCTGTGTTGAA-  
205 3' and reverse 5'-GGTTGTCCACTGGGTAAGTGA-3'; *ACTB* forward 5'-  
206 GGAATTCGAGCAAGAGATGG-3' and reverse 5'-AGCACTGTGTTGGCGTACAG-3'; *GAPDH*  
207 forward 5'-GCTCCTCCTGTTCGACAGTCA-3' and reverse 5'-ACCTTCCCCATGGTGTCTGA-  
208 3'. Gene expression levels were calculated using the  $2^{-\Delta\Delta C_t}$  methodology [22].  
209

210 *Western blot analysis.* HAECs and HUVECs were washed 2x with cold PBS and then lysed in 2x  
211 Laemmli sample buffer on ice. Protein lysate was then loaded into a 10% polyacrylamide gel and  
212 separated. Protein levels were determined by anti-WAVE2 (sc-373889; Santa Cruz Biotechnology,  
213 Dallas, TX), anti-GAPDH (c-32233; Santa Cruz), and anti-ACTB (sc-1616; Santa Cruz) antibodies.  
214 Densitometry was performed using ImageJ software [23].  
215

216 *Immunofluorescence and Scoring of Cells with Lamellipodia and Filopodia.* HUVECs were fixed in  
217 formaldehyde on glass slides and permeabilized in Triton-X. Cells were stained with Rhodamine  
218 Phalloidin (1:300) (Life Technologies), then with DAPI (1:10,000) and then mounted using ProLong  
219 (ThermoFisher Scientific). HUVECs were scored positive for the presence of lamellipodia if they  
220 displayed at least one actin-rich (phalloidin positive) ruffled structure at the edge of the cell.  
221 Filopodia were scored positive if at least two actin-positive finger-like protrusions were observed  
222 emanating from the cell. We used a Zeiss Observer D1 microscope with an AxioCam1Cc1 camera.  
223 Only cells that were either isolated or only attached to one other cell were counted. The number of  
224 positive cells is shown as a ratio to all DAPI-stained cells and cell area was measured using  
225 AxioVision Rel 4.7 software. This approach was modified from [24].  
226

227 *Statistical Analysis.* The Student's *t*-test was used when comparing two groups unless otherwise  
228 indicated. A *p*-value of <0.05 was considered statistically significant and calculations were  
229 performed in Prism GraphPad v8.2.0, unless otherwise indicated.  
230

## 231 **Results**

232 We used the DIANA-Tarbase v7.0 [20] and TargetScan v7.2 [21] algorithms to identify  
233 potential miR-1253 mRNA targets in humans. DIANA-Tarbase predicted 4,723 mRNAs as potential  
234 targets and TargetScan identified 5,345 mRNAs (Figure 1A, see Supp. File 1 for complete list).  
235 There were 2,885 unique mRNAs that overlapped between both prediction programs and we used  
236 this list moving forward with our *in silico* analysis. We compared the 2,885 mRNAs with the 3,354  
237 mRNAs found to be differentially-expressed in PBMCs in our hypertension cohort when comparing  
238 gene expression between AA and white women with or without hypertension [9]. We found that 840  
239 of the miR-1253 predicted targets exhibited differential-expression in PBMCs (Figure 1B; Supp. File  
240 1) and 112 of these predicted targets are also found in our previously-curated list of 1,266 genes  
241 related to hypertension and inflammation (Figure 1C; Supp. File 1) [9].

242 We next sought to further parse down this list of 112 mRNA targets and validate the role of  
243 miR-1253 in potentially regulating expression of some of these mRNAs. We over-expressed 50 nM  
244 of miR-1253 mimic in human aortic endothelial cells (HAECs) for 48 hours and performed a  
245 discovery microarray to assess gene expression level changes. We used Ingenuity Pathway Analysis  
246 (IPA) to identify the Top Disease and Disorders and Molecular and Cellular Functions associated  
247 with miR-1253 over-expression. We observed that pathways related to cardiovascular disease,  
248 cellular growth and proliferation, and cellular assembly and organization were the most significantly  
249 affected in response to miR-1253 expression and within the top five of pathways in each category  
250 (Figure 1D).

251 We next examined DGE in the actin cytoskeleton signaling pathway in our hypertension  
252 cohort by reanalyzing our previous microarray dataset [GSE75672](#). We chose this pathway given the  
253 role of actin cytoskeletal remodeling and signaling in hypertension and endothelial function [25-27]  
254 and the importance of this pathway in CVD and cellular growth and proliferation identified in IPA  
255 (Figure 1D). We used IPA to overlay mRNA expression in PBMCs that were isolated from 24 age-  
256 matched females who were either African American normotensive women (AANT), African  
257 American hypertensive women (AAHT), white normotensive women (WNT), or white hypertensive  
258 women (WHT; n=6/group, as previously extensively described in [9]) to identify DGE in the actin  
259 cytoskeleton signaling pathway.

260 While only *PAK* was significantly higher in AANT compared with WNT in this pathway  
261 (Figure 2A), we found that 27 genes of the 75 in the actin cytoskeleton signaling pathway are  
262 significantly different ( $P < 0.05$  and  $|\text{fold-change}| > 1.5$ ; Supp. Table 1) when comparing AAHT with  
263 WHT (Figure 2B). There are only three genes significantly different in this pathway between WHT  
264 and WNT in our cohort (*ARP2*, *ACTG1* [*F-actin*], and *SRC*; Supp. Figure 1A) and *ARP2* and *ACTG1*  
265 are reciprocally-expressed when comparing AAHT with AANT (Supp. Figure 1B), suggesting that  
266 these genes exhibit DGE by race in hypertensive women. We also observed that there are more genes  
267 significantly different when comparing AAHT with AANT (Supp. Figure 1B) than when comparing  
268 WHT with WNT, suggesting that the actin cytoskeleton signaling pathway is an overlooked gene  
269 pathway when examining health disparities in hypertension, particularly in AA women.

270 In order to determine whether miR-1253 might play a role in the differential-expression of  
271 genes within the actin cytoskeleton signaling pathway, we compared those mRNAs significantly  
272 down-regulated in HAECs via over-expression of miR-1253 mimic against the 1,266 genes in our  
273 hypertension gene list. There were 747 mRNAs significantly repressed  $> 1.5$ -fold compared with the  
274 scrambled negative control ( $P < 0.05$ ; FDR  $< 0.20$ ; n=5; Supp. File 1). Of these 747, 23 mRNAs are  
275 within our hypertension gene list and significantly different in our hypertension cohort (Table 1).  
276 One of these genes, WASP family Verprolin-homologous protein 2 (*WAVE2*), plays a role in the  
277 regulation of the actin cytoskeleton [24, 28]. miR-1253 is also predicted to target two other genes in  
278 the actin cytoskeleton pathway, Filamin A, Alpha (*FLNA*) and Ras Homolog A (*RHOA*), however,  
279 neither of these two mRNAs were significantly down-regulated by miR-1253 in our screen.  
280 Therefore, we focused on *WAVE2* as a potential target of miR-1253.

281 We performed a luciferase reporter assay using miTarget reporter vectors to confirm that  
282 miR-1253 can regulate the 3' untranslated region (UTR) of *WAVE2*. The 3' UTR of *WAVE2* is 3,959  
283 nucleotides in length and was split between two miRTarget plasmids. These heterologous reporter  
284 plasmids contain luciferase with a downstream renilla luciferase (RL) transfection control. The  
285 miRTarget *WAVE2* 3'UTR-1 plasmid contains the first 2,010 nucleotides of the *WAVE2* 3' UTR,  
286 including the last 21 nucleotides of its coding region. The miRTarget *WAVE2* 3' UTR-2 plasmid  
287 contains nucleotides 1,888 to 3,959 of the *WAVE2* 3' UTR and there is a common overlap of 122  
288 nucleotides of the 3'UTR between plasmid 1 and 2 (Figure 3A). TargetScan predicted that miR-1253  
289 binds to the *WAVE2* 3' UTR at nucleotides 3,734 to 3,756 in the second half of the *WAVE2* 3' UTR,  
290 which is referred to as the *WAVE2* 3'UTR binding site #3 (Figure 3B). We also identified potential

291 seed region binding sites at two additional positions at nucleotides 1,617 to 1,622 (binding site #1)  
292 and 1,775 to 1,780 (binding site #2), which are found in the first half of the 3'UTR (Figure 3A).  
293 Human umbilical vein endothelial cells (HUVECs) were co-transfected with 50 nM miR-1253 or  
294 scrambled control mimics and either miRTarget *WAVE2* 3'UTR-1 or 3'UTR-2. We observed  
295 significant repression of luciferase activity for miRTarget 3'UTR-1 ( $P<0.01$ ,  $n=3$ ) and miRTarget  
296 3'UTR-2 ( $P<0.001$ ,  $n=3$ ) in the presence of miR-1253 and compared to scrambled control (Figure  
297 3C). These data indicated that miR-1253 can bind to the *WAVE2* 3' UTR and reduce protein  
298 expression.

299 We next validated whether miR-1253 can regulate *WAVE2* expression *in vitro*. We over-  
300 expressed 50 nM miR-1253 mimic for 48 hours in human aortic endothelial cells (HAECs). In the  
301 presence of miR-1253, *WAVE2* mRNA levels were significantly repressed nearly 50% ( $P<0.05$ ;  $n=3$ )  
302 and the corresponding *WAVE2* protein levels were significantly down-regulated by nearly 60%  
303 ( $P<0.01$ ;  $n=3$ ) compared with a scrambled control mimic (Figure 4A). In order to verify this is not a  
304 cell-line specific effect, we also performed the same experiments in HUVEC cells. miR-1253 mimics  
305 significantly repressed *WAVE2* mRNA 55% ( $P<0.01$ ;  $n=5$ ) and *WAVE2* protein 38% ( $P<0.001$ ;  $n=5$ )  
306 (Figure 4B). Together, these results confirm our *in silico* prediction that miR-1253 can regulate the  
307 expression of *WAVE2* protein in endothelial cells.

308 Given that *WAVE2* is a key regulator of actin cytoskeleton dynamics, we assessed whether  
309 this regulatory network may affect the actin cytoskeleton. We transfected 50 nM scrambled control or  
310 miR-1253 mimics into HUVECs for 48 hours and stained with rhodamine phalloidin to visualize  
311 actin cytoskeletal structures. We observed morphological changes in cells transfected with miR-1253  
312 mimic compared to scrambled control mimics (Figure 5). Protrusive actin-containing structures such  
313 as lamellipodia or filopodia are formed at the leading edge of cells. Lamellipodia form larger actin-  
314 containing ruffles while filopodia are characterized by actin-containing finger-like extensions from  
315 the cell. Cells with transfected miR-1253 had increased lamellipodia formation as shown by  
316 concentrated actin-rich membrane-ruffling at the edges of cells. Therefore, we scored these cells by  
317 the presence of either lamellipodia or filopodia. We observed that there was a significant increase in  
318 lamellipodia in HUVECs with miR-1253, indicating an increase in actin-rich membrane ruffling at  
319 the edges of the cells ( $P<0.001$ ;  $n=3$ ) (Figure 5A and 5B). miR-1253 did not affect the formation of  
320 actin-rich filopodia projections. We did observe an increase in cell surface area of approximately  
321 60%, however this was not statistically significant ( $P=0.09$ ;  $n=3$ ) (Figure 5C). Together, miR-1253  
322 regulate *WAVE2* in endothelial cells leading to changes in endothelial cell lamellipodia formation.

## 323 324 Discussion

325 Together, our data indicate that a large number of genes within the actin cytoskeleton  
326 signaling pathway are differentially-expressed in PBMCs between AA and white hypertensive  
327 women, with nearly all of these genes exhibiting similar expression levels between normotensive AA  
328 and white women (Figure 2, Supp. Fig 1). This suggests that the DGE patterns associated with  
329 hypertension occur sometime as the disease process begins or after sustained exposure to elevated  
330 systemic blood pressure levels. Previously, we found similar patterns in additional pathways related  
331 to hypertension [8, 9] providing further evidence that DGE is associated with individual gene  
332 expression levels in individuals with high blood pressure. Here, we found that miR-1253, identified  
333 in our previous analysis [9] but without a functionally-validated role in hypertension, was predicted  
334 to target *WAVE2* in the actin cytoskeleton pathway. This gene expression analysis in PBMCs led us  
335 to validate that miR-1253 can bind and regulate *WAVE2* expression in endothelial cells and  
336 influence actin cytoskeletal dynamic (Figures 4-5).

337 DGE within the actin cytoskeleton signaling pathway in hypertension has previously  
338 remained relatively unexplored, particularly in the context of AA women with hypertension. Most  
339 studies have examined the role of this pathway in downstream conditions of which hypertension is a

340 major risk factor. Pathway analysis of gene expression in coronary artery atherosclerosis plaques  
341 identified that focal adhesion and actin cytoskeleton pathways as some of the most differentially-  
342 expressed between early and late-stage plaques [29]. In human macrophages, *FLNA* expression is  
343 higher in advanced atherosclerotic plaques compared with intermediary plaques and inhibition of  
344 *FLNA* expression in mice reduced plaque development, suggesting a role for this gene and the actin  
345 cytoskeleton in hypertension-related CVDs [30]. *FLNA* is expressed in human and mouse endothelial  
346 cells after myocardial infarction. When its expression is inhibited the endothelial response to cardiac  
347 repair, migration, and VEGF-A secretion was reduced and this promoted left ventricular dysfunction  
348 and heart failure [31]. In our analysis, we found that AA women have higher levels of *FLNA*  
349 compared with white women which may suggest that additional members of this pathway are  
350 relevant in hypertension etiology and the development of end organ complications.

351 Altered levels of other members of the actin cytoskeleton signaling pathway have been  
352 observed but not in the context of gender or race. Bradykinin receptors 1 and 2, which act as  
353 upstream regulators of vessel wall remodeling, are significantly upregulated in peripheral monocytes  
354 of essential hypertensives and hypertension treatment reduces their expression [32]. The Rho/ROCK  
355 signaling cascade regulates organization of the actin cytoskeleton and cell morphology, including  
356 adhesion of cells along the endothelium of the vasculature [33-35]. Members of the RhoA family  
357 have been extensively examined as targets for hypertension therapy [36], and given its upregulation  
358 in AA women with hypertension [shown here and in [9]], the targeting of elevated *RHOA* expression  
359 and the downstream impact on cytoskeleton function may be a novel area for intervention in AA  
360 women. Follow-up studies are warranted to investigate this.

361 We identified differential expression of *WAVE2* between AA and white women with  
362 hypertension. *WAVE2* is an actin nucleation promoting factor and binds with the actin-related  
363 protein (Arp) 2/3 complex to promote actin filament nucleation and branching [37, 38]. Variation in  
364 *WAVE2* expression modulates actin branching and influences the formation of cellular filopodia and  
365 lamellipodia [24, 28, 38-40]. We observed that repression of *WAVE2* levels due to miR-1253  
366 overexpression increased the formation of lamellipodia and membrane ruffling, consistent with  
367 lamellipodia formation and actin elongation dynamics related to *WAVE2* expression modulation  
368 [28]. It's possible that miR-1253 regulation of *WAVE2* in hypertensives may influence endothelial  
369 integrity and lead to downstream complications and additional studies are warranted to investigate  
370 this.

371 Modification of *WAVE2* expression by miR-1253 in either circulating monocytes or in  
372 endothelial cells may be associated with hypertension-related changes in membrane physiology and  
373 morphology. Endothelial response to increase shear stress and laminar flow has been found to be  
374 associated with race. HUVECs isolated from AAs are more responsive to laminar shear stress  
375 compared with HUVECs from whites, including in pathways related to nitric oxide synthase and  
376 oxidative stress response. Importantly, in both cases, exercise was able to improve upon those  
377 changes [41, 42]. A recent meta-analysis of studies comparing arterial stiffness between AAs and  
378 whites identified significant differences in AAs in aortic femoral pulse wave velocity and carotid-  
379 femoral pulse wave velocity [43] and build off of previous analysis that AAs can have impaired  
380 microvascular dilatory response [44]. Our findings here indicate that the actin cytoskeleton could  
381 influence or associate with these clinical observations and further consideration of the involvement of  
382 *WAVE2*, miR-1253, and related pathway genes will be important to identify any direct roles.

383 Our analysis identifies a novel regulatory role for miR-1253 and regulation of *WAVE2*.  
384 Previously, the only known role for miR-1253 has been found in cancer, where it regulates the  
385 expression of the long, non-coding RNA *FOXC2-AS1* in prostate cancer cells [45] and *WNT5A* in  
386 lung carcinoma [46]. This study is limited because it is not known whether differential-expression of  
387 miR-1253 in AA women with hypertension is a contributing cause or an effect of elevated high blood  
388 pressure. There is no data in the literature examining whether changes in miR-1253 influence



389 endothelial dysfunction via changes to the actin cytoskeleton and if these changes predispose  
390 individuals to atherosclerotic plaques or other hypertension-related complications. These questions  
391 were beyond the scope of this study. This finding also underscores the need to validate if miR-1253  
392 regulates WAVE2 expression in vascular smooth muscle cells, as this tissue is linked with the  
393 endothelial layer of the vasculature, or if miR-1253 expression changes in response to shear stress.

394 Many miRNAs play an important role in the normal and disease physiology of the  
395 vasculature. For example, miR-155 regulates endothelial *eNOS* and downstream vasodilation in  
396 human mammary arteries [47] and its expression is inversely correlated with target *AGTR1*  
397 expression in untreated hypertensives [48]. Several miRNAs, including miR-143 and miR-145,  
398 regulate vascular smooth muscle cell function and have been found to be differentially-expressed in  
399 PBMCs and correlated with 24-hr diastolic blood pressure and pulse pressure in individuals with  
400 hypertension [49]. It unknown if these miRNAs are correlated with disparities in hypertension,  
401 particularly in AA women, or involved in similar pathways as miR-1253.

402 Together, we have identified the actin cytoskeleton as a possible avenue to explore to further  
403 our understanding of how hypertension may develop and present in different populations.  
404 Importantly, we have identified a bioinformatic analysis pipeline that can identify and validate novel  
405 miRNA regulators for members of that pathway. Future studies will need to examine the *WAVE2*-  
406 miR-1253 relationship in order to further elucidate their role in hypertension and hypertension-  
407 related disparities.

#### 408 **Supplementary Materials**

409 Supplementary Table 1 and Supplementary Figure 1 can be found in the Supplementary Materials  
410 document. All gene lists from our miR-1253 prediction analysis, microarray analysis, and endothelial  
411 cells studies can be found in the excel file labeled Supplemental File 1.

#### 412 **Acknowledgements**

413 We thank Dr. Simonetta Camandola for the use of the luminometer for the luciferase assay readings  
414 and Dr. Elin Lehrmann for assistance with our microarray. We thank Althaf Lohani for preparing  
415 materials for the luciferase assays and for RNA isolations. We thank the HANDLS staff for their  
416 critical evaluation of HANDLS participants.

#### 417 **Author Contributions**

418 Conceptualization, M.A.A., N.N.H., M.K.E., and D.F.D. Methodology and Validation, M.A.A.,  
419 N.N.H., Y.Z., A.N.H., L.B.S., D.F.D. Formal Analysis, M.A.A., N.N.H., Y.Z., A.N.H., L.B.B.,  
420 M.K.E., and D.F.D. Writing Draft Preparation and Editing: M.A.A., N.N.H., and D.F.D. Contributed  
421 reagents/resources/software: N.N.H., Y.Z., M.K.E., and D.F.D. All authors reviewed the final  
422 manuscript.

#### 423 **Conflicts of Interest**

424 The authors declare no conflict of interest.

#### 425 **Funding**

426 This work was supported by NIMHD RCMI@Morgan #U54MD013367-8281, the NIA Intramural  
427 Research Program (AG000519), NIGMS RISE #R25GM058904, and NIGMS ASCEND  
428 #TL4GM118974.

#### 429 **Data Availability Statement**

430 The datasets analyzed for this study can be found in the Gene Expression Omnibus ([GSE75672](https://www.ncbi.nlm.nih.gov/geo/query/acc.cgi?acc=GSE75672)) and  
431 ([GSE139286](https://www.ncbi.nlm.nih.gov/geo/query/acc.cgi?acc=GSE139286)).

438

## 439 **Figure Legends**

440

441 **Figure 1: Target prediction analysis for miR-1253.** (A) Venn diagram of miR-1253 predicted  
442 mRNA targets overlapping between the DIANA-Tarbase and TargetScan algorithms. (B) Venn  
443 diagram of overlapping, predicted miR-1253 targets that are differentially expressed in PBMCs  
444 identified in [9]. (C) Venn diagram of miR-1253 predicted targets that are significantly,  
445 differentially-expressed in PBMCs and within hypertension-related pathways identified using  
446 Ingenuity Pathway Analysis (IPA). (D) List of significant Top Diseases and Disorders (Top) and  
447 Molecular and Cellular Functions (Bottom) in HAECs transfected with 50 nM miR-1253 mimic.  
448 These pathways were identified by Ingenuity Pathway Analysis.

449

450 **Figure 2: Gene expression analysis of the actin cytoskeleton in hypertensive women.** Microarray  
451 gene expression fold-changes in PBMCs isolated from AANT, WNT, AAHT, and WHT were  
452 imported into Ingenuity Pathway Analysis (IPA) and overlaid onto the actin cytoskeleton pathway.  
453 Red indicates significantly up-regulated expression and green indicates significant down-regulation  
454 in AANT compared with WNT (A) and in AAHT compared with WHT (B). Grey indicates a non-  
455 significant difference and white indicates no data available. All fold changes and P-values are listed  
456 for each gene and each comparison in Supplementary Table 1. AANT: African American  
457 normotensive women; AAHT: African American hypertensive women; WNT: White normotensive  
458 women; WHT: White hypertensive women.

459

460 **Figure 3: miR-1253 targeting of the WAVE2 3'UTR.** (A) Schematic of the miRTarget WAVE2 3'  
461 UTR vectors (plasmid 1 and 2). The predicted binding sites of miR-1253 to WAVE2 3'UTR are  
462 indicated in red with designated base pair positions. (B) Base pair schematic of binding site #3 of  
463 miR-1253 to the 3' UTR region of WAVE2 as predicted by TargetScan. (C) The relative expression  
464 of luciferase (Luc) reporter in the presence of 50 nM miR-1253 for 48 hrs and compared with  
465 scrambled control. Data were normalized to an internal renilla control and normalized to 1.0.  
466 \*\* $P < 0.01$ ; \*\*\* $P < 0.001$ , by two-tailed student's T-test.

467

468 **Figure 4: Overexpression of miR-1253 in HAECs and HUVECs reduces expression of WAVE2.**  
469 50 nM miR-1253 was transfected into HAECs (n=3) (A) and HUVECs (n=5) (B) for 48 hrs and over-  
470 expressed in each cell line compared with a scrambled negative control mimic (scr.; top left). WAVE2  
471 expression was normalized to GAPDH in each cell line and shown relative to scrambled (scr.; top  
472 right). WAVE2 proteins levels were normalized to Beta Actin (HAECs) or GAPDH (HUVECs) and  
473 shown relative to a scrambled control (scr.; bottom left). Representative immunoblots are shown for  
474 WAVE2 and loading controls in each cell line (bottom right) \* $P < 0.05$ , \*\* $P < 0.01$ , \*\*\* $P < 0.001$ , by  
475 one-tailed T-test (for confirmation of miR-1253 expression levels in each cell line) or two-tailed  
476 student's T-test for all comparisons of mRNA and protein levels.

477

478 **Figure 5: miR-1253 increases lamellipodia in HUVECs.** (A) Representative pictures of HUVECs  
479 transfected with either scrambled control mimics (scr., left panel) or miR-1253 (right panel) and  
480 stained with rhodamine phalloidin for actin filaments and DAPI for nuclei visualization. (B) Percent  
481 of cells visualized and counted for filopodia or lamellipodia in cells transfected with the scrambled or  
482 miR-1253 mimic versus total number of DAPI-stained cells (n=3). (C) Quantitation of cell surface  
483 area of HUVECs transfected with the scr. control or miR-1253 mimic (n=3). \*\* $P < 0.01$ , # $P = 0.09$ ;  
484 Two-tailed student's T-test. Scale bar = 10  $\mu\text{m}$ .

485

## 486 **References**

- 487 1. Benjamin, E. J., P. Muntner, A. Alonso, M. S. Bittencourt, C. W. Callaway, A. P. Carson, A.  
488 M. Chamberlain, A. R. Chang, S. Cheng, S. R. Das, F. N. Delling, L. Djousse, M. S. V.  
489 Elkind, J. F. Ferguson, M. Fornage, L. C. Jordan, S. S. Khan, B. M. Kissela, K. L. Knutson,  
490 T. W. Kwan, D. T. Lackland, T. T. Lewis, J. H. Lichtman, C. T. Longenecker, M. S. Loop, P.  
491 L. Lutsey, S. S. Martin, K. Matsushita, A. E. Moran, M. E. Mussolino, M. O'Flaherty, A.  
492 Pandey, A. M. Perak, W. D. Rosamond, G. A. Roth, U. K. A. Sampson, G. M. Satou, E. B.  
493 Schroeder, S. H. Shah, N. L. Spartano, A. Stokes, D. L. Tirschwell, C. W. Tsao, M. P.  
494 Turakhia, L. B. VanWagner, J. T. Wilkins, S. S. Wong, S. S. Virani, Epidemiology American  
495 Heart Association Council on, Committee Prevention Statistics, and Subcommittee Stroke  
496 Statistics. "Heart Disease and Stroke Statistics-2019 Update: A Report from the American  
497 Heart Association." *Circulation* 139, no. 10 (2019): e56-e528.
- 498 2. Patel, S. A., M. Winkel, M. K. Ali, K. M. Narayan, and N. K. Mehta. "Cardiovascular  
499 Mortality Associated with 5 Leading Risk Factors: National and State Preventable Fractions  
500 Estimated from Survey Data." *Ann Intern Med* 163, no. 4 (2015): 245-53.
- 501 3. Nedelec, Y., J. Sanz, G. Baharian, Z. A. Szpiech, A. Pacis, A. Dumaine, J. C. Grenier, A.  
502 Freiman, A. J. Sams, S. Hebert, A. Page Sabourin, F. Luca, R. Blekhman, R. D. Hernandez,  
503 R. Pique-Regi, J. Tung, V. Yotova, and L. B. Barreiro. "Genetic Ancestry and Natural  
504 Selection Drive Population Differences in Immune Responses to Pathogens." *Cell* 167, no. 3  
505 (2016): 657-69 e21.
- 506 4. Thames, A. D., M. R. Irwin, E. C. Breen, and S. W. Cole. "Experienced Discrimination and  
507 Racial Differences in Leukocyte Gene Expression." *Psychoneuroendocrinology* 106 (2019):  
508 277-83.
- 509 5. Wang, B. D., K. Ceniccola, Q. Yang, R. Andrawis, V. Patel, Y. Ji, J. Rhim, J. Olender, A.  
510 Popratiloff, P. Latham, Y. Lai, S. R. Patierno, and N. H. Lee. "Identification and Functional  
511 Validation of Reciprocal MicroRNA-Mrna Pairings in African American Prostate Cancer  
512 Disparities." *Clin Cancer Res* 21, no. 21 (2015): 4970-84.
- 513 6. Gardner, A. W., D. E. Parker, P. S. Montgomery, D. Sosnowska, A. I. Casanegra, Z. Ungvari,  
514 A. Csiszar, and W. E. Sonntag. "Gender and Racial Differences in Endothelial Oxidative  
515 Stress and Inflammation in Patients with Symptomatic Peripheral Artery Disease." *J Vasc*  
516 *Surg* 61, no. 5 (2015): 1249-57.
- 517 7. Moayed, Y., C. S. Fan, R. J. H. Miller, M. Tremblay-Gravel, J. G. D. Posada, C. Manlhiot,  
518 D. Hiller, J. Yee, R. Woodward, J. A. McCaughan, M. A. Shullo, S. A. Hall, S. Pinney, K. K.  
519 Khush, H. J. Ross, and J. J. Teuteberg. "Gene Expression Profiling and Racial Disparities in  
520 Outcomes after Heart Transplantation." *J Heart Lung Transplant* 38, no. 8 (2019): 820-29.
- 521 8. Dluzen, D. F., Y. Kim, P. Bastian, Y. Zhang, E. Lehrmann, K. G. Becker, N. Noren Hooten,  
522 and M. K. Evans. "MicroRNAs Modulate Oxidative Stress in Hypertension through Parp-1  
523 Regulation." *Oxid Med Cell Longev* 2017 (2017): 3984280.
- 524 9. Dluzen, D. F., N. Noren Hooten, Y. Zhang, Y. Kim, F. E. Glover, S. M. Tajuddin, K. D.  
525 Jacob, A. B. Zonderman, and M. K. Evans. "Racial Differences in MicroRNA and Gene  
526 Expression in Hypertensive Women." *Sci Rep* 6 (2016): 35815.
- 527 10. Liang, J., T. H. Le, D. R. V. Edwards, B. O. Tayo, K. J. Gaulton, J. A. Smith, Y. Lu, R. A.  
528 Jensen, G. Chen, L. R. Yanek, K. Schwander, S. M. Tajuddin, T. Sofer, W. Kim, J. Kayima,  
529 C. A. McKenzie, E. Fox, M. A. Nalls, J. H. Young, Y. V. Sun, J. M. Lane, S. Cechova, J.  
530 Zhou, H. Tang, M. Fornage, S. K. Musani, H. Wang, J. Lee, A. Adeyemo, A. W. Dreisbach,  
531 T. Forrester, P. L. Chu, A. Cappola, M. K. Evans, A. C. Morrison, L. W. Martin, K. L.

- 532 Wiggins, Q. Hui, W. Zhao, R. D. Jackson, E. B. Ware, J. D. Faul, A. P. Reiner, M. Bray, J. C.  
533 Denny, T. H. Mosley, W. Palmas, X. Guo, G. J. Papanicolaou, A. D. Penman, J. F. Polak, K.  
534 Rice, K. D. Taylor, E. Boerwinkle, E. P. Bottinger, K. Liu, N. Risch, S. C. Hunt, C.  
535 Kooperberg, A. B. Zonderman, C. C. Laurie, D. M. Becker, J. Cai, R. J. F. Loos, B. M. Psaty,  
536 D. R. Weir, S. L. R. Kardia, D. K. Arnett, S. Won, T. L. Edwards, S. Redline, R. S. Cooper,  
537 D. C. Rao, J. I. Rotter, C. Rotimi, D. Levy, A. Chakravarti, X. Zhu, and N. Franceschini.  
538 "Single-Trait and Multi-Trait Genome-Wide Association Analyses Identify Novel Loci for  
539 Blood Pressure in African-Ancestry Populations." *PLoS Genet* 13, no. 5 (2017): e1006728.
- 540 11. Ness, R. B., C. L. Haggerty, G. Hager, and R. Ferrell. "Differential Distribution of Allelic  
541 Variants in Cytokine Genes among African Americans and White Americans." *Am J*  
542 *Epidemiol* 160, no. 11 (2004): 1033-8.
- 543 12. Mukherji, S., M. S. Ebert, G. X. Zheng, J. S. Tsang, P. A. Sharp, and A. van Oudenaarden.  
544 "MicroRNAs Can Generate Thresholds in Target Gene Expression." *Nat Genet* 43, no. 9  
545 (2011): 854-9.
- 546 13. Hergenreider, E., S. Heydt, K. Treguer, T. Boettger, A. J. Horrevoets, A. M. Zeiher, M. P.  
547 Scheffer, A. S. Frangakis, X. Yin, M. Mayr, T. Braun, C. Urbich, R. A. Boon, and S.  
548 Dimmeler. "Atheroprotective Communication between Endothelial Cells and Smooth Muscle  
549 Cells through Mirnas." *Nat Cell Biol* 14, no. 3 (2012): 249-56.
- 550 14. Schober, A., M. Nazari-Jahantigh, Y. Wei, K. Bidzhekov, F. Gremse, J. Grommes, R. T.  
551 Megens, K. Heyll, H. Noels, M. Hristov, S. Wang, F. Kiessling, E. N. Olson, and C. Weber.  
552 "MicroRNA-126-5p Promotes Endothelial Proliferation and Limits Atherosclerosis by  
553 Suppressing Dlk1." *Nat Med* 20, no. 4 (2014): 368-76.
- 554 15. Shi, L., and I. Fleming. "One Mir Level of Control: MicroRNA-155 Directly Regulates  
555 Endothelial Nitric Oxide Synthase Mrna and Protein Levels." *Hypertension* 60, no. 6 (2012):  
556 1381-2.
- 557 16. Kriegel, A. J., M. A. Baker, Y. Liu, P. Liu, A. W. Cowley, Jr., and M. Liang. "Endogenous  
558 MicroRNAs in Human Microvascular Endothelial Cells Regulate Mrnas Encoded by  
559 Hypertension-Related Genes." *Hypertension* 66, no. 4 (2015): 793-9.
- 560 17. Jusic, A., Y. Devaux, and E. U-CardioRNA COST Action. "Noncoding Rnas in  
561 Hypertension." *Hypertension* 74, no. 3 (2019): 477-92.
- 562 18. Evans, M. K., J. M. Lepkowski, N. R. Powe, T. LaVeist, M. F. Kuczmarski, and A. B.  
563 Zonderman. "Healthy Aging in Neighborhoods of Diversity across the Life Span (HANDS):  
564 Overcoming Barriers to Implementing a Longitudinal, Epidemiologic, Urban Study of Health,  
565 Race, and Socioeconomic Status." *Ethn Dis* 20, no. 3 (2010): 267-75.
- 566 19. Cheadle, C., M. P. Vawter, W. J. Freed, and K. G. Becker. "Analysis of Microarray Data  
567 Using Z Score Transformation." *J Mol Diagn* 5, no. 2 (2003): 73-81.
- 568 20. Vlachos, I. S., M. D. Paraskevopoulou, D. Karagkouni, G. Georgakilas, T. Vergoulis, I.  
569 Kanellos, I. L. Anastasopoulos, S. Maniou, K. Karathanou, D. Kalfakakou, A. Fevgas, T.  
570 Dalamagas, and A. G. Hatzigeorgiou. "Diana-Tarbase V7.0: Indexing More Than Half a  
571 Million Experimentally Supported Mirna:Mrna Interactions." *Nucleic Acids Res* 43, no.  
572 Database issue (2015): D153-9.
- 573 21. Agarwal, V., G. W. Bell, J. W. Nam, and D. P. Bartel. "Predicting Effective MicroRNA Target  
574 Sites in Mammalian Mrnas." *Elife* 4 (2015).

- 575 22. Livak, K. J., and T. D. Schmittgen. "Analysis of Relative Gene Expression Data Using Real-  
576 Time Quantitative Pcr and the 2(-Delta Delta C(T)) Method." *Methods* 25, no. 4 (2001): 402-  
577 8.
- 578 23. Schneider, C. A., W. S. Rasband, and K. W. Eliceiri. "Nih Image to Imagej: 25 Years of  
579 Image Analysis." *Nat Methods* 9, no. 7 (2012): 671-5.
- 580 24. Beli, P., D. Mascheroni, D. Xu, and M. Innocenti. "Wave and Arp2/3 Jointly Inhibit  
581 Filopodium Formation by Entering into a Complex with Mdia2." *Nat Cell Biol* 10, no. 7  
582 (2008): 849-57.
- 583 25. Davies, P. F. "Hemodynamic Shear Stress and the Endothelium in Cardiovascular  
584 Pathophysiology." *Nat Clin Pract Cardiovasc Med* 6, no. 1 (2009): 16-26.
- 585 26. Iskratsch, T., H. Wolfenson, and M. P. Sheetz. "Appreciating Force and Shape-the Rise of  
586 Mechanotransduction in Cell Biology." *Nat Rev Mol Cell Biol* 15, no. 12 (2014): 825-33.
- 587 27. Spindler, V., N. Schlegel, and J. Waschke. "Role of Gtpases in Control of Microvascular  
588 Permeability." *Cardiovasc Res* 87, no. 2 (2010): 243-53.
- 589 28. Krause, M., and A. Gautreau. "Steering Cell Migration: Lamellipodium Dynamics and the  
590 Regulation of Directional Persistence." *Nat Rev Mol Cell Biol* 15, no. 9 (2014): 577-90.
- 591 29. Tan, X., X. Zhang, L. Pan, X. Tian, and P. Dong. "Identification of Key Pathways and Genes  
592 in Advanced Coronary Atherosclerosis Using Bioinformatics Analysis." *Biomed Res Int* 2017  
593 (2017): 4323496.
- 594 30. Bandaru, S., C. Ala, R. Salimi, M. K. Akula, M. Ekstrand, S. Devarakonda, J. Karlsson, J.  
595 Van den Eynden, G. Bergstrom, E. Larsson, M. Levin, J. Boren, M. O. Bergo, and L. M.  
596 Akyurek. "Targeting Filamin a Reduces Macrophage Activity and Atherosclerosis."  
597 *Circulation* 140, no. 1 (2019): 67-79.
- 598 31. Bandaru, S., J. Gronros, B. Redfors, C. Cil, D. Pazooki, R. Salimi, E. Larsson, A. X. Zhou, E.  
599 Omerovic, and L. M. Akyurek. "Deficiency of Filamin a in Endothelial Cells Impairs Left  
600 Ventricular Remodelling after Myocardial Infarction." *Cardiovasc Res* 105, no. 2 (2015):  
601 151-9.
- 602 32. Marketou, M. E., J. Kontaraki, E. Zacharis, F. Parthenakis, S. Maragkoudakis, I. Gavras, H.  
603 Gavras, and P. E. Vardas. "Differential Gene Expression of Bradykinin Receptors 1 and 2 in  
604 Peripheral Monocytes from Patients with Essential Hypertension." *J Hum Hypertens* 28, no. 7  
605 (2014): 450-5.
- 606 33. Byrne, K. M., N. Monsefi, J. C. Dawson, A. Degasperi, J. C. Bukowski-Wills, N. Volinsky,  
607 M. Dobrzynski, M. R. Birtwistle, M. A. Tsyganov, A. Kiyatkin, K. Kida, A. J. Finch, N. O.  
608 Carragher, W. Kolch, L. K. Nguyen, A. von Kriegsheim, and B. N. Kholodenko. "Bistability  
609 in the Rac1, Pak, and Rhoa Signaling Network Drives Actin Cytoskeleton Dynamics and Cell  
610 Motility Switches." *Cell Syst* 2, no. 1 (2016): 38-48.
- 611 34. Carbone, M. L., G. Chadeuf, S. Heurtebise-Chretien, X. Prieur, T. Quillard, Y. Goueffic, N.  
612 Vaillant, M. Rio, L. Castan, M. Durand, C. Baron-Menguy, J. Aureille, J. Desfrancois, A.  
613 Tesse, R. M. Torres, and G. Loirand. "Leukocyte Rhoa Exchange Factor Arhgef1 Mediates  
614 Vascular Inflammation and Atherosclerosis." *J Clin Invest* 127, no. 12 (2017): 4516-26.
- 615 35. Narumiya, S., and D. Thumkeo. "Rho Signaling Research: History, Current Status and Future  
616 Directions." *FEBS Lett* 592, no. 11 (2018): 1763-76.

## miR-1253 Regulates Endothelial WAVE2 Expression

- 617 36. Dee, R. A., K. D. Mangum, X. Bai, C. P. Mack, and J. M. Taylor. "Druggable Targets in the  
618 Rho Pathway and Their Promise for Therapeutic Control of Blood Pressure." *Pharmacol Ther*  
619 193 (2019): 121-34.
- 620 37. Kang, H., J. Wang, S. J. Longley, J. X. Tang, and S. K. Shaw. "Relative Actin Nucleation  
621 Promotion Efficiency by Wasp and Wave Proteins in Endothelial Cells." *Biochem Biophys*  
622 *Res Commun* 400, no. 4 (2010): 661-6.
- 623 38. Rotty, J. D., C. Wu, and J. E. Bear. "New Insights into the Regulation and Cellular Functions  
624 of the Arp2/3 Complex." *Nat Rev Mol Cell Biol* 14, no. 1 (2013): 7-12.
- 625 39. Innocenti, M., S. Gerboth, K. Rottner, F. P. Lai, M. Hertzog, T. E. Stradal, E. Frittoli, D.  
626 Didry, S. Polo, A. Disanza, S. Benesch, P. P. Di Fiore, M. F. Carlier, and G. Scita. "Abi1  
627 Regulates the Activity of N-Wasp and Wave in Distinct Actin-Based Processes." *Nat Cell*  
628 *Biol* 7, no. 10 (2005): 969-76.
- 629 40. Suarez, C., and D. R. Kovar. "Internetwork Competition for Monomers Governs Actin  
630 Cytoskeleton Organization." *Nat Rev Mol Cell Biol* 17, no. 12 (2016): 799-810.
- 631 41. Babbitt, D. M., J. S. Kim, S. J. Forrester, M. D. Brown, and J. Y. Park. "Effect of Interleukin-  
632 10 and Laminar Shear Stress on Endothelial Nitric Oxide Synthase and Nitric Oxide in  
633 African American Human Umbilical Vein Endothelial Cells." *Ethn Dis* 25, no. 4 (2015): 413-  
634 8.
- 635 42. Fearheller, D. L., J. Y. Park, V. Rizzo, B. Kim, and M. D. Brown. "Racial Differences in the  
636 Responses to Shear Stress in Human Umbilical Vein Endothelial Cells." *Vasc Health Risk*  
637 *Manag* 7 (2011): 425-31.
- 638 43. Buie, J. N. J., A. Stanley, P. J. Nietert, A. Logan, R. J. Adams, and G. S. Magwood. "Racial  
639 Disparities in Arterial Stiffness between Healthy Whites and African Americans in the United  
640 States: A Meta-Analysis." *J Natl Med Assoc* 111, no. 1 (2019): 7-17.
- 641 44. Morris, A. A., R. S. Patel, J. N. Binongo, J. Poole, I. Al Mheid, Y. Ahmed, N. Stoyanova, V.  
642 Vaccarino, R. Din-Dzietham, G. H. Gibbons, and A. Quyyumi. "Racial Differences in  
643 Arterial Stiffness and Microcirculatory Function between Black and White Americans." *J Am*  
644 *Heart Assoc* 2, no. 2 (2013): e002154.
- 645 45. Chen, Y., M. Gu, C. Liu, X. Wan, Q. Shi, Q. Chen, and Z. Wang. "Long Noncoding Rna  
646 Foxc2-As1 Facilitates the Proliferation and Progression of Prostate Cancer Via Targeting  
647 Mir-1253/Ezh2." *Gene* 686 (2019): 37-42.
- 648 46. Liu, M., Y. Zhang, J. Zhang, H. Cai, C. Zhang, Z. Yang, Y. Niu, H. Wang, X. Wei, W. Wang,  
649 P. Gao, H. Li, J. Zhang, and G. Sun. "MicroRNA-1253 Suppresses Cell Proliferation and  
650 Invasion of Non-Small-Cell Lung Carcinoma by Targeting Wnt5a." *Cell Death Dis* 9, no. 2  
651 (2018): 189.
- 652 47. Sun, H. X., D. Y. Zeng, R. T. Li, R. P. Pang, H. Yang, Y. L. Hu, Q. Zhang, Y. Jiang, L. Y.  
653 Huang, Y. B. Tang, G. J. Yan, and J. G. Zhou. "Essential Role of MicroRNA-155 in Regulating  
654 Endothelium-Dependent Vasorelaxation by Targeting Endothelial Nitric Oxide Synthase."  
655 *Hypertension* 60, no. 6 (2012): 1407-14.
- 656 48. Ceolotto, G., I. Papparella, A. Bortoluzzi, G. Strapazzon, F. Ragazzo, P. Bratti, A. S.  
657 Fabricio, E. Squarcina, M. Gion, P. Palatini, and A. Semplicini. "Interplay between Mir-155,  
658 At1r A1166c Polymorphism, and At1r Expression in Young Untreated Hypertensives." *Am J*  
659 *Hypertens* 24, no. 2 (2011): 241-6.

- 660 49. Kontaraki, J. E., M. E. Marketou, E. A. Zacharis, F. I. Parthenakis, and P. E. Vardas.  
 661 "Differential Expression of Vascular Smooth Muscle-Modulating Micrnas in Human  
 662 Peripheral Blood Mononuclear Cells: Novel Targets in Essential Hypertension." *J Hum*  
 663 *Hypertens* 28, no. 8 (2014): 510-6.

664 **Table 1: Summary of miR-1253 Predict Targets Repressed in HAECs\***  
 665

| <b>Predicted miR-1253 Targets (compared w/scrambled control)</b>                                                                                                       | <b>FDR</b> | <b>Fold Change</b> | <b>P-Value</b> | <b>Z-Ratio</b> |
|------------------------------------------------------------------------------------------------------------------------------------------------------------------------|------------|--------------------|----------------|----------------|
| ABCB10                                                                                                                                                                 | 0.0172     | -1.53              | 0.0032         | -2.83          |
| ACO1                                                                                                                                                                   | 0          | -7.58              | 0              | -11.94         |
| ACSL1                                                                                                                                                                  | 0          | -1.69              | 0              | -3.32          |
| DCUN1D5                                                                                                                                                                | 0.0116     | -1.87              | 0.002          | -3.87          |
| DPYSL2                                                                                                                                                                 | 0          | -1.61              | 0              | -2.47          |
| DUSP14                                                                                                                                                                 | 0          | -2.13              | 0              | -4.46          |
| MSN                                                                                                                                                                    | 0          | -1.83              | 0              | -3.15          |
| PARP1                                                                                                                                                                  | 0          | -4.4               | 0              | -8.57          |
| PDE12                                                                                                                                                                  | 0          | -2                 | 0              | -4.36          |
| POLA1                                                                                                                                                                  | 0          | -1.53              | 0              | -2.82          |
| PTGER4                                                                                                                                                                 | 0          | -1.72              | 0              | -3.05          |
| RAB27A                                                                                                                                                                 | 0          | -2.06              | 0              | -4.5           |
| RSU1                                                                                                                                                                   | 0          | -2.16              | 0              | -4.78          |
| RXRA                                                                                                                                                                   | 0          | -1.54              | 0              | -2.61          |
| SEC62                                                                                                                                                                  | 0          | -1.55              | 0              | -2.96          |
| SERINC3                                                                                                                                                                | 0          | -2.51              | 0              | -5.53          |
| SPARC                                                                                                                                                                  | 0          | -1.91              | 0              | -3.55          |
| TFRC                                                                                                                                                                   | 0          | -1.71              | 0              | -3.1           |
| TMEM127                                                                                                                                                                | 0          | -1.89              | 0              | -4.07          |
| TNS3                                                                                                                                                                   | 0          | -1.83              | 0              | -3.68          |
| TOPBP1                                                                                                                                                                 | 0          | -2.09              | 0              | -4.35          |
| UBE2N                                                                                                                                                                  | 0.0005     | -1.56              | 0.0001         | -2.67          |
| WAVE2                                                                                                                                                                  | 0          | -1.64              | 0              | -3.09          |
| *mRNAs also found to be significantly and differentially expressed in PMBCs in hypertensive AA and white women and with hypertension related pathways outlined in [9]. |            |                    |                |                |

666

**Figure 1****A** Predicted miR-1253 TargetsDIANA-Tarbase TargetScan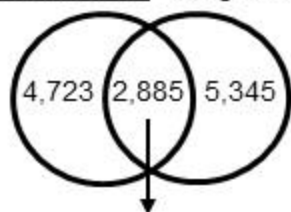**B** miR-1253 Targets DGE in PBMCs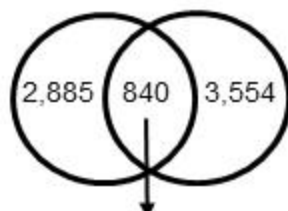**C** miR-1253 Targets Hypertension-Related Genes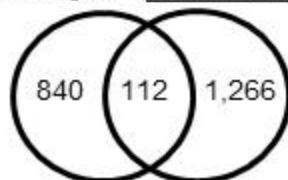**D**

| Top Diseases and Disorders                 |                     |                |
|--------------------------------------------|---------------------|----------------|
| Name                                       | p-value range       | # of Molecules |
| Infectious Diseases                        | 1.09E-02 – 1.28E-12 | 310            |
| Dermatological Diseases and Conditions     | 1.11E-02 – 1.28E-07 | 181            |
| <b>Cardiovascular Disease</b>              | 9.69E-03 – 3.52E-07 | 219            |
| Organismal Injury and Abnormalities        | 1.11E-02 – 3.52E-07 | 1728           |
| Reproductive System Disease                | 9.22E-03 – 3.52E-07 | 618            |
| Molecular and Cellular Functions           |                     |                |
| Name                                       | p-value range       | # of Molecules |
| Cell Death and Survival                    | 11.1E-02 – 3.82E-18 | 514            |
| <b>Cellular Growth and Proliferation</b>   | 1.09E-02 – 5.36E-17 | 521            |
| Cell Cycle                                 | 1.11E-02 – 4.51E-10 | 288            |
| <b>Cellular Assembly and Organization</b>  | 1.06E-02 – 4.51E-10 | 260            |
| DNA Replication, Recombination, and Repair | 1.06E-02 – 4.51E-10 | 193            |



**Figure 2****A**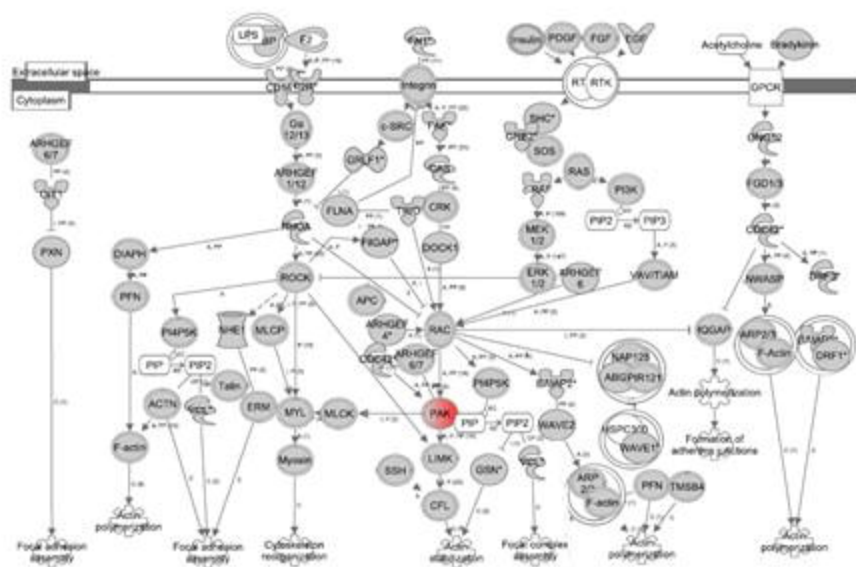**AANT vs. WNT****B**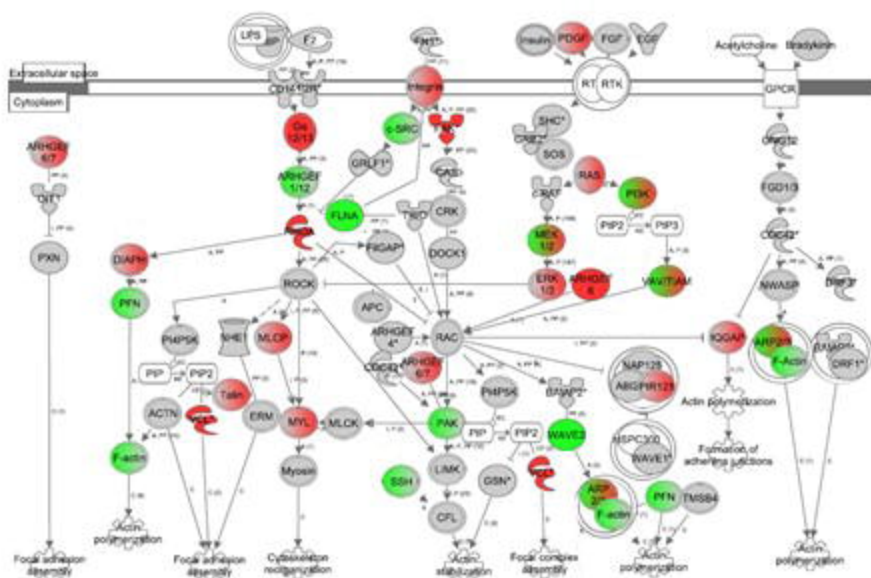**AAHT vs. WHT**

**Figure 3**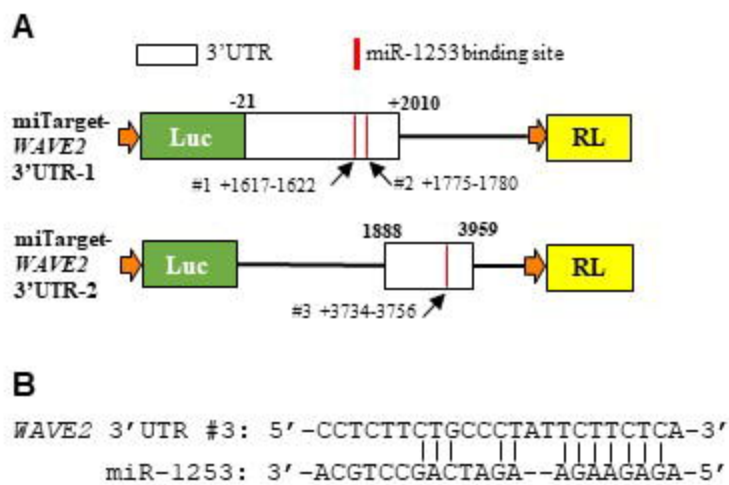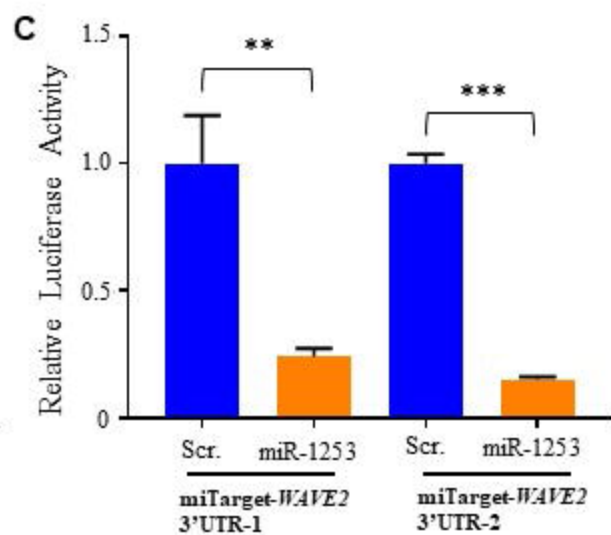

**Figure 4**

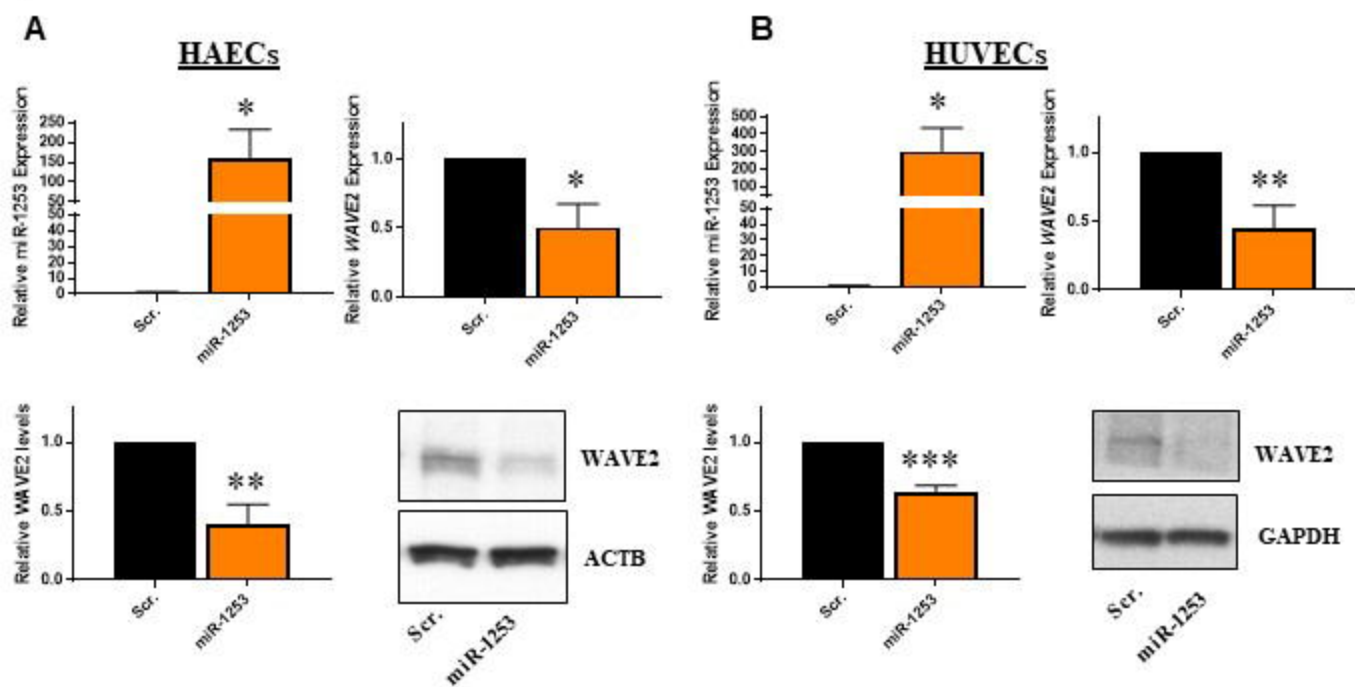

Figure 5

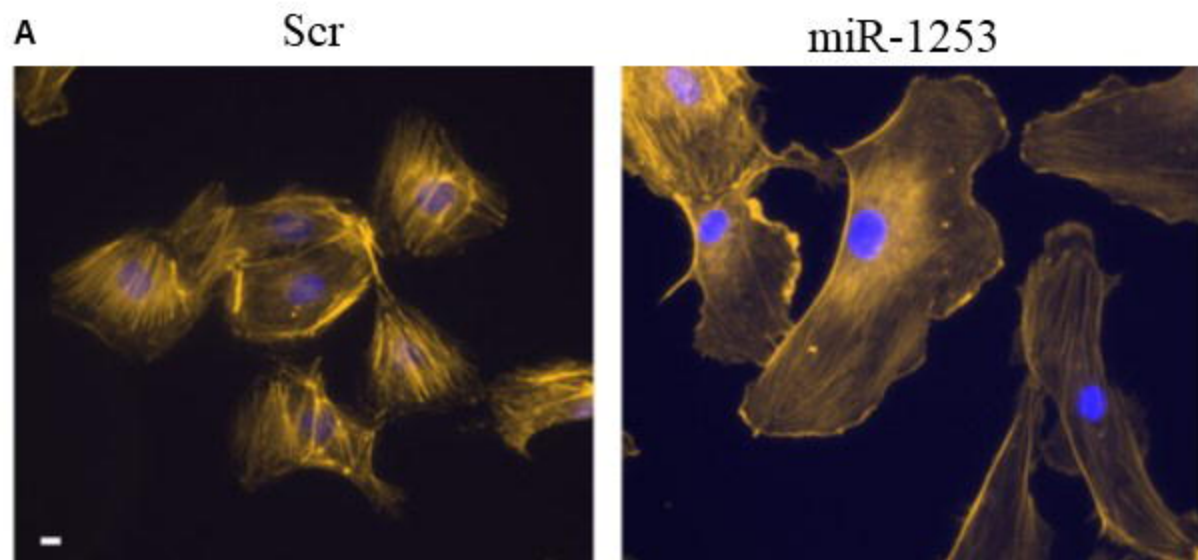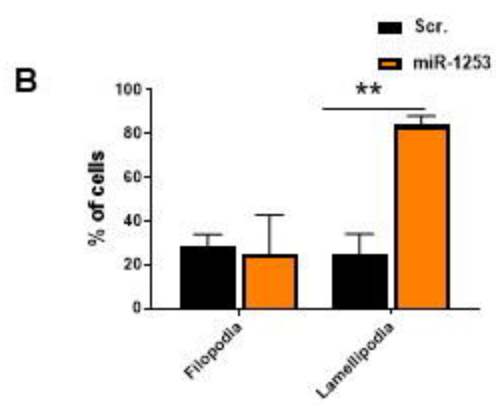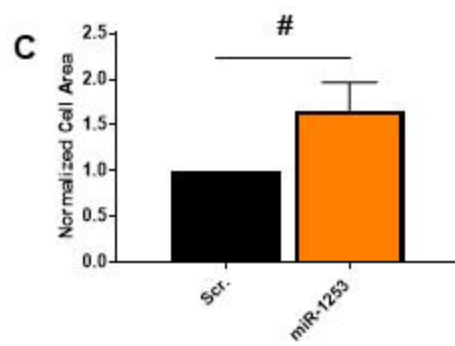

Source: https://www.biorxiv.org/content/10.1101/833673v2.full.pdf
